# Supplementary material for: Isoenzymes of the Flavonoid and Phenylpropanoid Pathways Show Organ-Specific Regulation during Apple Fruit Development
Source: MDPI journal article supplement (doi:10.3390/ijms241814353), 2023-09-20
Supplement: s1 [file s1]

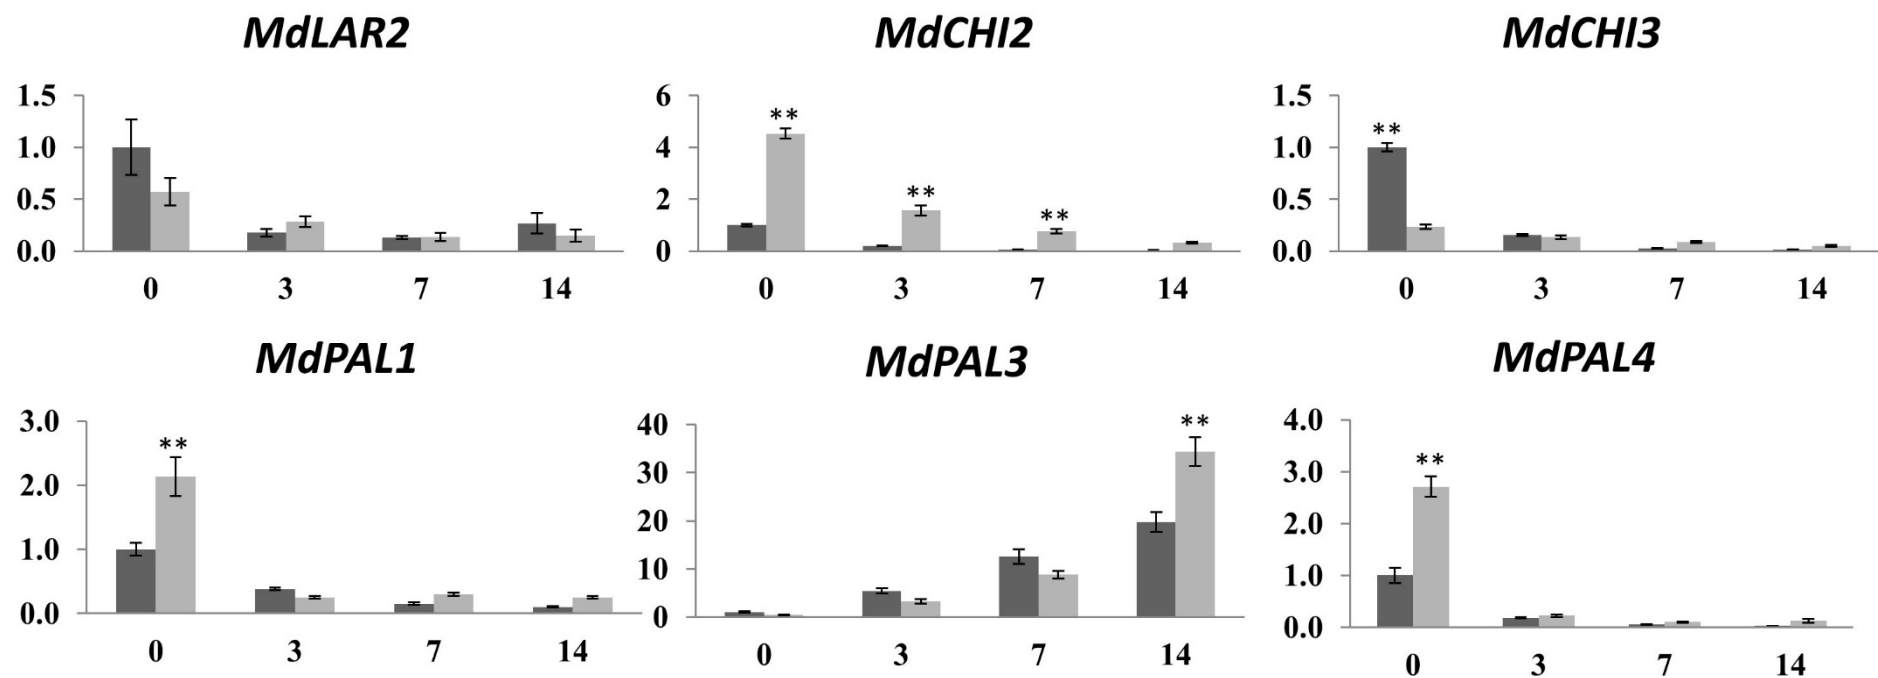

**Figure S4.** Relative expression levels of apple genes showing similar trends of expression regulation in ‘Golden Delicious’ (dark grey) and Manchurian crabapple (light gray) at 0, 3, 7, 14 DAF (*x* axis). The expression levels are indicated on the *y* axis and are relative to the value at 0 DAF in ‘Golden Delicious’. All the data were normalized to actin and *EF1α*. Bars represent the standard deviation for three biological replicates. Significant differences between ‘Golden Delicious’ and Manchurian crabapple are indicated (\**p*<0.05; \*\**p*<0.01).
