# Supplementary material for: Isoenzymes of the Flavonoid and Phenylpropanoid Pathways Show Organ-Specific Regulation during Apple Fruit Development
Source: MDPI journal article supplement (doi:10.3390/ijms241814353), 2023-09-20
Supplement: s1 [file s1]

**Table S5.** List of the putative transcription factor-binding motifs selected for the creation of a motif-abundance profile (MAP). A brief description of each binding motif is included as found on NewPLACE site (<https://www.dna.affrc.go.jp/PLACE/?action=newplace>).

### MYB-related motifs

#### MYBCORE

Keyword: MYB; myb; dehydration; water; stress; flavonoid biosynthesis; leaf; shoot.

Description: Binding site for all animal MYB and at least two plant MYB proteins ATMYB1 and ATMYB2, both isolated from Arabidopsis; ATMYB2 is involved in regulation of genes that are responsive to water stress in Arabidopsis; A petunia MYB protein (MYB.Ph3) is involved in regulation of flavonoid biosynthesis (Solano et al. EMBO J 14:1773 (1995)); See S000355.

#### MYBST1

Keyword: MYB; myb; Myb.

Description: Core motif of MybSt1 (a potato MYB homolog) binding site; MybSt1cDNA clone was isolated by using CaMV 35S promoter domain A as a probe. The Myb motif of the MybSt1 protein is distinct from the plant Myb DNA binding domain described so far.

#### EECCRCAH1

Keyword: low-CO<sub>2</sub>.

Description: "EEC"; Consensus motif of the two enhancer elements, EE-1 and EE-2, both found in the promoter region of the Chlamydomonas Cah1 (encoding a periplasmic carbonic anhydrase); Binding site of Myb transcription factor LCR1 (see Yoshioka et al, 2004); N=A/G/C/T.

#### MYB2CONSENSUSAT

Keyword: MYB; rd22BP1; ABA; leaf; seed; stress.

Description: MYB recognition site found in the promoters of the dehydration-responsive gene rd22 and many other genes in Arabidopsis; Y=C/T; K=G/T; See S000177 (MYB2), S000175 (MYBATRD22).

#### MYBCOREATCYCB1

Keyword: Cyc; M phase; Myb.

Description: "Myb core" in the 18 bp sequence which is able to activate reporter gene without leading to M-phase-specific expression, found in the promoter of Arabidopsis thaliana cyclin B1:1 gene; the 18 bp sequence share homology with a sequence found in the *N.sylvestris* cyclin B1 promoter.

#### MYB1AT

Keyword: MYB; rd22BP1; ABA; leaf; seed; stress.

Description: MYB recognition site found in the promoters of the dehydration-responsive gene rd22 and many other genes in Arabidopsis; W=A/T.

#### MYBPLANT

Keyword: Myb; MYB; Myb305; AmMYB308; AmMYB330; flower; PAL; CHS; DFR; Candi; Bz1; phenylpropanoid; lignin; leaf; shoot.

Description: Plant MYB binding site; Consensus sequence related to box P in promoters of phenylpropanoid biosynthetic genes such as PAL, CHS, CHI, DFR, CL, Bz1; Myb305; M=A/C; W=A/T; See S000355; The AmMYB308 and AmMYB330 transcription factors from *Antirrhinum majus* regulate phenylpropanoid and lignin biosynthesis in transgenic tobacco.

#### MYB1LEPR

Keyword: Pti4; ERF; PR; MYB.

Description: Tomato Pti4(ERF) regulates defence-related gene expression via GCC box and non-GCC box cis elements (Myb1(GTTAGTT), G box(CACGTG)).

### **WRKY-related motifs**

#### **WBOXHVIS01**

Keyword: sugar; SURE; patatin; WRKY; isoamylase; SUSIBA2.

Description: SUSIBA2 bind to W-box element in barley iso1 (encoding isoamylase1) promoter.

#### **WBOXATNPR1**

Keyword: NPR1; WRKY; WRKY18; disease resistance; SA; W box.

Description: "W-box" found in promoter of Arabidopsis thaliana (A.t.) NPR1 gene; Located between +70 and +79 in tandem; They were recognized specifically by salicylic acid (SA)-induced WRKY DNA binding proteins; See S000142 (SQ=TTGACC); See S000310 (SQ=TTTGACY); A cluster of WRKY binding sites act as negative regulatory elements for the inducible expression of AtWRKY18. See also S000142.

#### **WBOXNTCHN48**

Keyword: W-box; W box; WRKY; elicitor.

Description: "W box" identified in the region between -125 and -69 of a tobacco class I basic chitinase gene CHN48; NtWRKY1, NtWRKY2 and NtWRKY4 bound to W box; NtWRKYs possibly involved in elicitor-responsive transcription of defense genes in tobacco; Y=C/T; see also S000442 (TGACT) and S000447 (TGAC).

#### **WRKY71OS**

Keyword: WRKY; GA; MYB; W box; TGAC; PR proteins.

Description: "A core of TGAC-containing W-box" of, e.g., Amy32b promoter; Binding site of rice WRKY71, a transcriptional repressor of the gibberellin signaling pathway; Parsley WRKY proteins bind specifically to TGAC-containing W box elements within the Pathogenesis-Related Class10 (PR-10) genes; See S000390 (TTGAC), S000442 (TGACT).

### **Light-responsive motifs**

#### **INRNTPSADB**

Keyword: initiator; light-responsive transcription; TATA-less promoter; psaDb; Inr element.

Description: "Inr (initiator)" elements found in the tobacco psaDb gene promoter without TATA boxes; Light-responsive transcription of psaDb depends on Inr, but not TATA box.

#### **IBOXCORE**

Keyword: I box; I-box; rbcS; light regulation; light; leaf; shoot.

Description: "I box"; "I-box"; Conserved sequence upstream of light-regulated genes; Conserved sequence upstream of light-regulated genes of both monocots and dicots; See IBOX (S000124).

#### **PRECONSCRHSP70A**

Keyword: HSP; chlorophyll; MgProto.

Description: Consensus sequence of PRE (plastid response element) in the promoters of HSP70A in Chlamydomonas; Involved in induction of HSP70A gene by both MgProto and light; S=G/C; Y=C/T; R=A/G; H=T/C/A; D=A/T/G.

#### 10PEHVPSBD

Keyword: psbD; chloroplast gene expression; circadian rhythms; light regulation.

Description: "-10 promoter element" found in the barley (H.v.) chloroplast psbD gene promoter; Involved in the expression of the plastid gene psbD which encodes a photosystem II reaction center chlorophyll-binding protein that is activated by blue, white or UV-A light.

#### GATABOX

Keyword: ASF-2; GATA box; Cab; chlorophyll a/b binding protein; leaf; shoot.

Description: "GATA box"; GATA motif in CaMV 35S promoter; binding with ASF-2; three GATA box repeats were found in the promoter of Petunia(P.h.) chlorophyll a/b binding protein, Cab22 gene. Required for high level, light regulated, and tissue specific expression; conserved in the promoter of all LHCII type I Cab genes.

#### GT1CONSENSUS

Keyword: GT-1; light; TATA; TFIIA; TBP; HR; SAR; TMV; leaf; shoot.

Description: Consensus GT-1 binding site in many light-regulated genes, e.g., RBCS from many species, PHYA from oat and rice, spinach RCA and PETA, and bean CHS15; R=A/G; W=A/T; For a compilation of related GT elements and factors. GT-1 can stabilize the TFIIA-TBP-DNA (TATA box) complex; The activation mechanism of GT-1 may be achieved through direct interaction between TFIIA and GT-1; Binding of GT-1-like factors to the PR-1apromoter influences the level of SA-inducible gene expression.

#### Abiotic stress-related motifs

##### ABRELATERD1

Keyword: ABRE; etiolation; erd;

Description: ABRE-like sequence (from -199 to -195) required foretiolation-induced expression of erd1 (early responsive to dehydration) in Arabidopsis.

##### CCAATBOX1

Keyword: HSE (Heat shock element); CCAAT box.

Description: Common sequence found in the 5'-non-coding regions of eukaryotic genes; "CCAAT box" found in the promoter of heat shock protein genes; Located immediately upstream from the most distal HSE of the promoter; "CCAAT box" act cooperatively with HSEs to increase the hs promoter activity.

##### MYCCONSENSUSAT

Keyword: MYC; rd22BP1; ABA; leaf; seed; stress; CBF3; cold; CBF/DREB1;ICE1; RRE.

Description: MYC recognition site found in the promoters of the dehydration-responsive gene rd22 and many other genes in Arabidopsis; Binding site of ATMYC2 (previously known asrd22BP1); see S000144 (E-box; CANNTG), S000174 (MYCATRD22);N=A/T/G/C; MYC recognition sequence in CBF3 promoter; Binding site of ICE1 (inducer of CBF expression 1) that regulates the transcription of CBF/DREB1 genes in the cold in Arabidopsis; ICE1. This sequence is also known as RRE (Rresponse element).

##### ACGTATERD1

Keyword: ACGT; etiolation; erd.

Description: ACGT sequence (from -155 to -152) required for etiolation-induced expression of erd1 (early responsive to dehydration) in Arabidopsis.

## **Biotic stress-related motifs**

### **GT1GMSCAM4**

Keyword: GT-1 box.

Description: "GT-1 motif" found in the promoter of soybean (*Glycine max*) CaMisoform, SCaM-4; Plays a role in pathogen- and salt-induced SCaM-4 gene expression; See also S000198 (GT-1 consensus).

### **CACGTGMOTIF**

Keyword: G box; G-box; rbcS; chs; ACGT element; adh; Bz-2; R-motif; STR;GT-1; GBF; elicitor; bZIP; napin; strictosidine synthase; cell;leaf; shoot; Pti4; ERF; PR.

Description: "CACGTG motif"; "G-box"; Binding site of *Arabidopsis* GBF4; *C.roseus* G-box binding factor 1 (CrGBF1) and 1 (CrGBF2) can act as transcriptional repressors of the Str promoter via direct interaction with the G-box; See S000345; Essential for expression of beta-phaseolin gene during embryogenesis in bean, tobacco, *Arabidopsis*; Tomato Pti4 (ERF) regulates defense-related gene expression via GCC box and non-GCC box cis-element (Myb1(GTTAGTT) and G-box (CACGTG)); A prominent hit by in silico analysis in both induced and repressed phyA-responsive promoters; Review by Terzaghi WB, Cashmore AR.

### **ASF1MOTIFCAMV**

Keyword: TGACG; root; leaf; CaMV; 35S; promoter; auxin; salicylic acid; light; as-1; TGA1a, TGA1b; CREB; ASF1; TGA6; shoot; xenobiotic stress; SAR; SA; Disease resistance.

Description: "ASF-1 binding site" in CaMV 35S promoter; ASF-1 binds to two TGACG motifs; See S000023 (AS1); Found in HBP-1 binding site of wheat histone H3 gene; TGACG motifs are found in many promoters and are involved in transcriptional activation of several genes by auxin and/or salicylic acid; May be relevant to light regulation; Binding site of tobacco TGA1a; TGA1a and b show homology to CREB; TGA6 is a new member of the TGA family; Abiotic and biotic stress differentially stimulate "as-1 element" activity.
