# Supplementary material for: Isoenzymes of the Flavonoid and Phenylpropanoid Pathways Show Organ-Specific Regulation during Apple Fruit Development
Source: MDPI journal article supplement (doi:10.3390/ijms241814353), 2023-09-20
Supplement: s1 [file s1]

**Table S3.** List of sequences obtained from the qPCR cloned bands.

***MdCHI1***

GTTCCCGGGCAACTTTGCTTTGTTGCAGGGGAAACACCATGCTTTCCCACCATCGACTC  
TAGAACTGCCTCGGAAAGTAGTTTGCTTTCTATCACTGCATTTGCAGCTTCCGGTATGG  
ATGCATCTTTGGAGAAGCTAATCGTGAGTAATCCTTCAGGAGATTGTGTGAAGAGAAT  
AGAGGGACCCGGTGGGAAGTTTTGATCTTTGAAAACATCAATGAACGTGTTCAATGGCT  
TTGCCTTCTAGATCAGTGTAATTTCCCACTGACTTCCAAAAGAATACACAATTCTCCGA  
AACTTAAA

***MdCHI2***

AAAAACTTTCCCACCCGGCGCCTCCATTCTTTTCACGCAATCTCCCAAAGGATCACTAA  
CGATTAGCTTCTCTAGAGATGCATCCGTACCTGAAGTTGCAAACACGGTGATAGAAAA  
CAAACACTTTTCCGAGGCAGTTCTAGAGTCAATCGTTGGAAAGCACGGTGTTTCTCCTG  
CAGCAAAGCAAAGTTTGGCCGCAAGGTTATCGGAATTGTTGAATGGGTGCAAGGAATC  
TTATCGTGCTG

***MdCHI3***

CTCTGACAAGTTTCGGAGATTGCGTTGCCTTTTGGAAGTCAATCGGAATTTACACTGAT  
GCAGAAGGCCAAAGCCATTGAAAAGTTCCTTGAAGTCTTCAAAGATCAAACTTCCCAC  
CCGGCGCCTCCATTCTTTTCACGCAATCTCCCAAAGGATCACTAACGATCAGCTTCTCT  
AGAGATGCATCCGTACCTAAAGCTGCAAACACGGTGATAGAAAACAACTACTTTCCG  
AGGCAGTTCTAGAATCGATCGTTGGAAAGCACGGTGTTTCTCCTGCAGCAAAGCAAAG  
TTTGGCCACAAGGTTATCTAAATTGTTGAGAGA

***MdPAL1***

GGGGAAAGTGCTTCGTGTGTTGGCGTCAACAGAACCATAGAAGCCAAACCAGACCCAA  
CTGCTGTTCCATTGACCAAGGCAAGCCCTTCTTTTGGTTGCAACTCAAAGAACCACCA  
TCAATCCCAGCTAGCTTAAAGGCATCAGAAGCGGTTAAGGTTTCCCCATTAGGTCCGGT  
GGACTTGGAGTTAGGCCTTCCAATCAAAAGCA

***MdPAL3***

GGGGGGCTATTAGATTCTTGAACGCTGGAGTGTTTGGAAGTGCTACAGAATCAGGCCA  
CACACTGCCACACCAAGCAACAAGAGCAGCCATGTTGGTCCGAATCAACACACTCCTC  
CAAGGCTACTCCGGCATAAGATTTCGAAATCTTGAAGCCATCACCAAGTTCCTGAACA  
ACAACGTTACTCCATGCTTGCCCCTACGCGGTACTATTACCGCCTCA

***MdPAL4***

GGGGGTGCTGCAAGATCCAGCATTCAAGAATCTAATTAGCTCCCTCTGAAGAGCTCCA  
CCTTGCTTGGTTCTCCTATGCGAGGTTGCACCAAAGCCAGTGGTCACACCATAGCTGTC  
TGTGCCTTTGCCCATGCTATCCATAACCCAATCACTGCTGGCCTTTACCCCAGCCCTTT  
GTCCTCCGACAGCTCCACCTTGGCACCGTCATGGTTGGCAATCGCAGCCACAACGTGA  
GGGGCAGGGGAGCTGTCCGAGGATAAAGGCGGGGTAAAGGCACCTGATTGGTTTATG  
CATAGCTGGGCCAGGACCACGCTATGGCGTGCCCTCCTTTGCCGCCTCCCTAGACCCCC  
CCCTGCCCCCCCCAAGCCACCACCCCCG

***Md4CL1***

GGCCACACGGGCATGCATTTGTTTCTTGGTCGATCACGCATAAACAAGTAACAGACAC  
CATGACCATTGCTTCCAGTTCCGTCGAAACTCAAAAGCCGGCAGACATACCTACCAAT  
CTCATGCCGTCTGAGATTAATTCTACCTCTCAACAAAATCTAACCCAATTGCAACCCGC

CGCCTGCACCAACAATATTATTGATTCCACCACCGCCACCTCCACCGCCACTGCCACCA  
CTAACCATGGGAATTAATATCAAAACCCC

#### ***Md4CL4***

AAATCCGCTCTCTTTCTCAATTCTTATTTTTCTGTATATTTCAATCTGTTTATTGGTCGAT  
ATATCACACACAAAGAAGC  
AACAGTCACCATGATCTCCATTGCTTCTAATTCCGTTGAAACCCAAAAGCCGGCAGAC  
ACATCTACCAATCTCATGCCTC  
CTCTGATTAATTCTACCTCTCAACAAAACCTAACCCAATTGCAACCCCCCGCCTGCACC  
AACAATATTATTGATTCCACC  
ACCGCCACCGCCACCAGTAACCATG

#### ***MdLAR1***

AATGGCTGCCTAATCGCCGTGTATCGATAGTAGTCTGAACATGAATTTGATCAACAGTC  
CTGATTCTGATAGATTGATCAAGCACAAGTGGGAGTGACAGCCCTGGATTTCGACGACG  
GCGTTTTTGGTGGAGACGTTCTCCTCATGCACTGGCTCTAG

#### ***MdLAR2***

CCATTTTTCTGTAATGAATTCCAGCTTCCTTGTCCAGCAATAAAAAATAAAATAAAAA  
TCAAATTAGTATCTTCCTCGAAGAAACCCTAGAAACCCTCCCCCTCCATACCAATTTTA  
TAACAAGCTCACCCCGAACTGTTGGAACATTTCTTTTCCTAGTAATAAATCCAGAACA  
TGA

#### ***MdDFR1***

ACCCGCGGCGACGACGATCCACTGGAGCGACGTTGAATTTTGCCTCTCCGTCAAGATG  
ACTGGTTGGATGTACTTCGTTTCCAAGACTCTAGCTGAGCAAGCTGCATGGAAGTATGC  
CAAAGAAAACAACATTGATTTTCATCACCATTATCCCAACTCTTGTGATTGGTCCATTTC  
TCATGCCATCCATGCCACCAAGCCTCATCACTGGACTTTCACCAATCACACGAACTAAA  
TCA

#### ***MdDFR2***

ACATAATTGGGCATCATCAGCAGGGCCAGTATGTTCACTTGGACGACCTCTGCCTTTCT  
CACATTTATCTTTACGAGCATCCGAAAGCCGAAGGCCGTTACATTTGTTTCGTACATGA  
TGCTACAATTACGAACTTGTA AAAATGCTCAGAGAAAAATACCCCGAATACAATATA  
CCCACAAAGTTCAAGGGCATCGACGACA ACTTAGAACCAGTTCATTTTTCTTCAAAGA  
AGTTGAGGGAGATAGGGTTTGAGTTCAAGTACAGCTTGGAGGACATGTTTGTGGGGGC  
TGTCGATGCGTGCCGGGCAAAGGGCTTGATTCCGATTCCGATTCCGGCAGAGAAA ACT  
GAGGCTGCTGAGGAGAGCAACCTCGTTGATGTCAAAGTTGGTTA

#### ***MdUFGT1***

ATCCATGCGGGAGAGTCATTTTCGGA ACTTGGACTCGGTAATTTCCGGCATGCTACTTC  
AGATGGGACGGCTCCTCCCCCGTGCCACCGCAGTTTTTCATGAACGGCTTCGAAGAATT  
GGA ACTCCCCATACCAAACGACCTAAAGTCCAAAGTCAACAACTCCTCAACGTAGGA  
CCTTCCAACGTAGCATCCCCGCTGCCACCGCTGCCGCCATCAGATGCTTGCTTGTCATG  
GCTAGACAAGCAACAGGCTCCATCCTCCGTCTGTACATAAGCTTCGGGACAGTGG

#### ***MdUFGT2***

TAGGGTATCGGAAGAGCTGCTAGCATAGCGGAGGCCCTGGAAGCCACAGGGGGCTCCCT  
TCTTGTGGTCGCTCAAGGACA ACTTCAAGACACCGTTGCTGAACGAGTTCTTGACAAA  
AATATTGTCAAAGGTGAACGGGATGGTGGTGCCGTGGGCTCCTCAGCCGCATGTCCTG  
GCCACGCTTCGGTCGGAGCTTTCGTGTCACATTGCGGCTGGA ACTCGCTGCTGGAGAC

TATAGCCGGAGGGGTGCCCATGATTTGTAGGCCATTTTTTGGAGACCACAGGCTTAATG  
CAAGGATGGTGGAGGACGAGTTGGAGATAGGGGTAAATGTGGA

***MdC4H1***

CGTACCATTGACACATCCTCGACGCGCAGCAGAAGGGAGAAATCAACGAGGACAATG  
TTCTCTACATCGTCGAGAACATCAATGTTGCTGCTATTGAAACCACATTGTGGTCGATC  
GAGTGGGGAATTGCCGAGCTAGTGAACCATCCTGAAATCCAGAAGAAGTTGAGGGAG  
GAACTTGACGCTGTCCTCGGTCGCGGAGTTCAGATCACAGAGCCTGATGTTTCAGAAAC  
TTCCCCAAACACTGTTTCGGAGCCACTGTGGGTACCAGGTCCTCCGTTACCGGTGGCATC  
TCCTACTGTTTTTTGTTTTTTGTAT

***MdC4H2***

CCTGAAATCTCTCTCGATGGGACAGCGCAACCTCGTCGTCGTCTCCTCGACGGAGCTCG  
CCAAGGAGGTGCTCCACACCCAGGGAGTCGAATTTGGGTCGAGGACCAGAAACGTCGT  
CGTTGATATTTTCACCGGTAAAGGCCAGGACATGGTGTTCACCGTCTACGGCGAGCACT  
GGCGGAAAATGAGGCGGATCATGACCGTTCCTTTCTTCACCAACAAGA
