# Supplementary material for: Isoenzymes of the Flavonoid and Phenylpropanoid Pathways Show Organ-Specific Regulation during Apple Fruit Development
Source: MDPI journal article supplement (doi:10.3390/ijms241814353), 2023-09-20
Supplement: s1 [file s1]

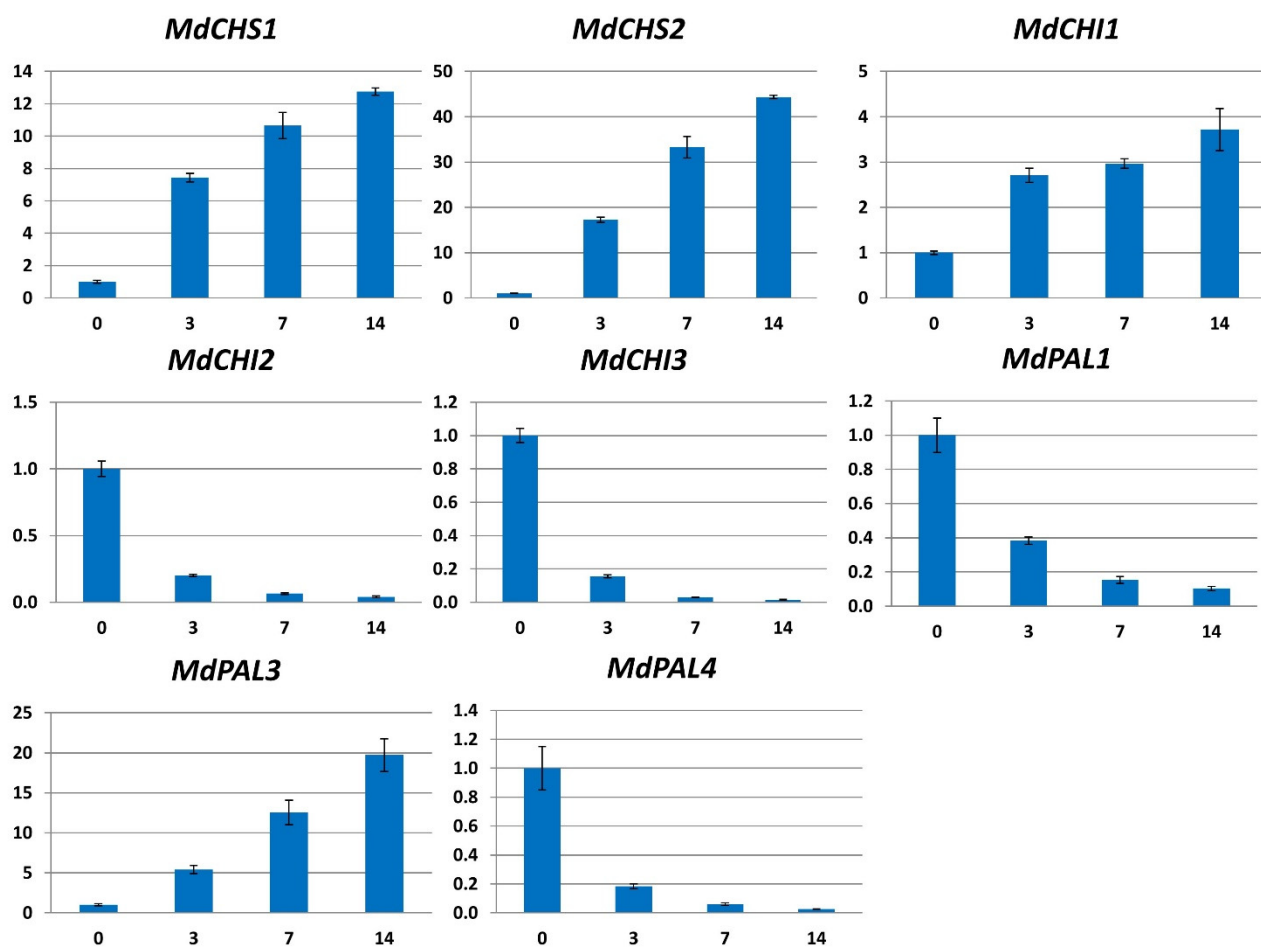

**Figure S1.** Relative expression levels of *MdCHS1*, *MdCHS2*, *MdCHI1*, *MdCHI2*, *MdCHI3*, *MdPAL1*, *MdPAL3* and *MdPAL4* in 'Golden Delicious' at 0, 3, 7, 14 DAF. The relative expression levels are indicated on the y axis and are relative to the value at 0 DAF and normalized to actin and *EF1α*. Bars represent the standard deviation for three biological replicates.
