# Supplementary material for: Isoenzymes of the Flavonoid and Phenylpropanoid Pathways Show Organ-Specific Regulation during Apple Fruit Development
Source: Int J Mol Sci. 2023 Sep 20;24(18):14353. doi: 10.3390/ijms241814353 (PMC10532258; doi:10.3390/ijms241814353)
Supplement: Supplementary file 1 [file ijms-24-14353-s001.zip]

Archive with 9 entries (9 files):
- Figure S3.pdf
- Figure S4.pdf
- Figure_S1.pdf
- Figure_S2.pdf
- Table S1_IJMS.xlsx
- Table S2_IJMS.xlsx
- Table S3_IJMS.pdf
- Table S4_IJMS.xlsx
- Table S5_IJMS.pdf
