# Supplementary material for: Isoenzymes of the Flavonoid and Phenylpropanoid Pathways Show Organ-Specific Regulation during Apple Fruit Development
Source: Int J Mol Sci. 2023 Sep 20;24(18):14353. doi: 10.3390/ijms241814353 (PMC10532258; doi:10.3390/ijms241814353)
Supplement: Supplementary file 1 [file ijms-24-14353-s001.zip › Table S1_IJMS.xlsx]

## Sheet: Foglio1
Table S1. List of apple sequences selected for RNAseq evaluation.
Enzyme	Reference sequences (UniProt)	Homologous sequences (NCBI)
PAL	>ENA|X68126|X68126.1	>VIEB01004159.1
	>ENA|JQ248934|JQ248934.1	>XM_008357397.3
		>XM_008389362.3
		>JQ248934.1
		>XM_029105821.1
		>XM_008368428.3
C4H	>ENA|DQ075002|DQ075002.1	>NM_001294106.1
	>ENA|JQ248935|JQ248935.1	>JQ248935.1
		>XM_029099060.1
		>XM_029099564.1
		>XM_029099565.1
4CL	>ENA|KY359350|KY359350.1	>XM_008364603.2
	>ENA|JQ248936|JQ248936.1	>JQ248936.1
	>ENA|KY359347|KY359347.1	>KY359349.1
	>ENA|KY359349|KY359349.1	>XM_029106270.1
	>ENA|KY359348|KY359348.1	>XM_029091143.1
		>XM_008365460.3
		>XM_029097005.1
CHS	>ENA|X68977|X68977.1	>HQ853494.1
	>ENA|JX102655|JX102655.1	>NM_001319252.1
	>ENA|JQ582624|JQ582624.2	>NM_001319257.1
	>ENA|DQ026297|DQ026297.1	>EU872156.1
	>ENA|EU872157|EU872157.1	>XM_029091251.1
	>ENA|AY786996|AY786996.1	>EU872157.1
	>ENA|FJ599763|FJ599763.1	>NM_001328985.1
	>ENA|EU872156|EU872156.1	>JQ582624.2
CHI	>ENA|FJ817485|FJ817485.1	>FJ817485.1
		>XM_008394013.3
		>XM_029100818.1
		>XM_029100826.1
		>X68978.1
		>X68979.1
		>AF494398.1
		>AF494400.1
		>AF494399.1
DFR	>ENA|AF117268|AF117268.1	>NM_001293939.1
	>ENA|FJ817487|FJ817487.1	>FJ817487.1
		>AY227728.1
		>XM_008379159.3
		>AB074488.1
FLS/F3H	>ENA|AF119095|AF119095.1	>NM_001319250.1
	>ENA|KF495602|KF495602.1	>AY965343.1
	>ENA|KF481683|KF481683.1	>KF481683.1
	>ENA|AY965343|AY965343.1	>XM_029106974.1
	>ENA|X69664|X69664.1	>XM_029106975.1
	>ENA|AB074486|AB074486.1	>XM_029095133.1
	>ENA|FJ817486|FJ817486.1	>AY965339.1
	>ENA|AY965340|AY965340.1	>NM_001293925.1
	>ENA|AY965339|AY965339.1	>NM_001293954.1
LAR	>ENA|AY830131|AY830131.1	>NM_001294114.1
	>ENA|JX892951|JX892951.1	>JX892951.1
	>ENA|KT276929|KT276929.1	>KT276928.1
	>ENA|DQ139835|DQ139835.1	>AY830132.1
	>ENA|JX892955|JX892955.1	>NM_001293860.1
	>ENA|AY830132|AY830132.1	>DQ139837.1
	>ENA|JX892949|JX892949.1	>JX892952.1
	>ENA|JX892952|JX892952.1	>JX892949.1
	>ENA|KT276928|KT276928.1	>DQ139835.1
	>ENA|DQ139837|DQ139837.1	>AY830130.1
		>JX892950.1
		>XM_029110431.1
		>KT276930.1
		>JX892956.1
		>DQ099803.1
		>NM_001294001.1
		>JN035300.1
		>KT276931.1
		>XM_008372994.3
ANS	>ENA|X71360|X71360.1	>NM_001293838.1
	>ENA|AB074487|AB074487.1	>KP742784.1
	>ENA|ABD04052|ABD04052.1	>NM_001328948.1
	>ENA|FJ817488|FJ817488.1
	>ENA|KP742784|KP742784.1
	>ENA|DQ156905|DQ156905.1
FGT	>ENA|AB074489|AB074489.1	>AB074489.1
	>ENA|AB169975|AB169975.1	>AB461385.1
		>AF117267.1
		>NM_001293991.1
		>XM_008358841.3
		>AB169975.1
ANR	>ENA|DQ099803|DQ099803.1	>DQ099803.1
	>ENA|JN035301|JN035301.1	>JX892950.1
	>ENA|JN035300|JN035300.1	>XM_029110431.1
	>ENA|AY830130|AY830130.1	>AY830130.1
	>ENA|JX892956|JX892956.1	>JX892956.1
	>ENA|JX892950|JX892950.1	>KT276930.1
	>ENA|KT276930|KT276930.1	>DQ139835.1
	>ENA|KT276931|KT276931.1	>JN035300.1
	>ENA|DQ139835|DQ139835.1	>NM_001294001.1
		>KT276931.1
		>XM_008372994.3
