# Supplementary material for: Isoenzymes of the Flavonoid and Phenylpropanoid Pathways Show Organ-Specific Regulation during Apple Fruit Development
Source: Int J Mol Sci. 2023 Sep 20;24(18):14353. doi: 10.3390/ijms241814353 (PMC10532258; doi:10.3390/ijms241814353)
Supplement: Supplementary file 1 [file ijms-24-14353-s001.zip › Table S2_IJMS.xlsx]

## Sheet: Foglio1
Table S2. List of apple unique transcripts expressed in one or more libraries. The sequences that were selected for RT-qPCR analysis are indicated on the left column.
Sequence name	Sequence ID
	ENA_KY359348_KY359348.1
Md4CL1	XM_008364603.2
	XM_008365460.3
	XM_029091143.1
Md4CL4	XM_029106270.1
	AB074488.1
	ENA_FJ817488_FJ817488.1
	ENA_X71360_X71360.1
MdC4H1	XM_029099060.1
MdC4H2	XM_029099564.1
	XM_029099565.1
	AF494398.1
	AF494399.1
MdCHI1	XM_008394013.3
MdCHI2	XM_029100818.1
MdCHI3	XM_029100826.1
MdCHS1	ENA_DQ026297_DQ026297.1
	ENA_FJ599763_FJ599763.1
MdCHS2	XM_029091251.1
MdDFR2	ENA_AF117268_AF117268.1
MdDFR1	XM_008379159.3
	ENA_ABD04052_ABD04052.1
	ENA_AY786996_AY786996.1
	ENA_FJ817486_FJ817486.1
	ENA_KY359347_KY359347.1
	ENA_KY359350_KY359350.1
	ENA_X68977_X68977.1
	HQ853494.1
MdLAR1	AY830132.1
MdLAR2	ENA_AY830131_AY830131.1
	NM_001293991.1
	ENA_X68126_X68126.1
MdPAL1	XM_008368428.3
	XM_008389362.3
MdPAL3	XM_008357397.3
MdPAL4	XM_029105821.1
MdUFGT1	AF117267.1
MdUFGT2	XM_008358841.3
	VIEB01004159.1
	XM_029097005.1
	XM_029110431.1
