# Supplementary material for: Isoenzymes of the Flavonoid and Phenylpropanoid Pathways Show Organ-Specific Regulation during Apple Fruit Development
Source: Int J Mol Sci. 2023 Sep 20;24(18):14353. doi: 10.3390/ijms241814353 (PMC10532258; doi:10.3390/ijms241814353)
Supplement: Supplementary file 1 [file ijms-24-14353-s001.zip › Table S4_IJMS.xlsx]

## Sheet: Matrix_of_Enzimi_Pathway_TFs_on
Table S4. List of all the putative transcription factor-binding motifs found on the promoters of the apple genes in analysis.
	>AY830130.1_Scaffold304673_283490_285990	>XM_029099565.1_Scaffold304732_692493_694993	>ENA|JX892956|JX892956.1_Scaffold304673_283500_286000	>XM_029105821.1_chr8_7052679_7055179	>ENA|FJ817486|FJ817486.1_chr2_11908014_11910514	>AB074489.1_chr7_30838446_30840946	>ENA|KT276929|KT276929.1_chr16_1533455_1535955	>NM_001319252.1_Scaffold302373_305876_308376	>ENA|AY830132|AY830132.1_chr13_2846216_2848716	>ENA|JN035300|JN035300.1_chr5_2427510_2430010	>NM_001294114.1_chr16_1533434_1535934	>XM_029095133.1_Scaffold318927_1146_3646	>NM_001319257.1_chr9_16930452_16932952	>ENA|AY786996|AY786996.1_chr9_16930452_16932952	>NM_001293838.1_chr6_17130876_17133376	>ENA|KY359348|KY359348.1_Scaffold316587_125612_128112	>ENA|AB074486|AB074486.1_chr5_23802718_23805218	>DQ099803.1_Scaffold304673_283448_285948	>XM_029106975.1_chr8_17496025_17498525	>NM_001293860.1_chr13_2846261_2848761	>ENA|DQ026297|DQ026297.1_Scaffold302373_305843_308343	>XM_008365460.3_Scaffold320110_2495_4995	>XM_029106974.1_chr8_17495879_17498379	>XM_008379159.3_chr8_4391146_4393646	>ENA|KY359350|KY359350.1_chr7_30910241_30912741	>XM_029099060.1_chr11_5203689_5206189	>ENA|KT276930|KT276930.1_Scaffold304673_283530_286030	>ENA|DQ026297|DQ026297.1_chr9_16930449_16932949	LAR_1	>XM_029097005.1_Scaffold320110_2494_4994	>NM_001293925.1_chr2_11907957_11910457	>ENA|KF481683|KF481683.1_Scaffold318805_0_1972	>KF481683.1_Scaffold318805_0_1972	>ENA|AF117268|AF117268.1_chr12_26019683_26022183	>ENA|JX892955|JX892955.1_chr13_2846261_2848761	>ENA|X71360|X71360.1_chr6_17130988_17133488	>JN035300.1_Scaffold313343_3846_6346	>KT276930.1_Scaffold304673_283530_286030	>ENA|AB074489|AB074489.1_chr7_30838446_30840946	>XM_008358841.3_Scaffold300794_5025025_5027525	>ENA|JQ248936|JQ248936.1_chr7_30910179_30912679	>XM_029100826.1_chr11_36805760_36808260	>XM_008394013.3_chr14_12379480_12381980	>XM_029099564.1_Scaffold304732_692931_695431	>NM_001328948.1_Scaffold313760_139624_142124	>XM_029091143.1_Scaffold316587_125615_128115	>ENA|EU872157|EU872157.1_chr9_16930452_16932952	>ENA|KT276928|KT276928.1_chr13_2846364_2848864	>ENA|FJ817487|FJ817487.1_chr12_26019709_26022209
DOFCOREZM	40	18	41	38	31	31	18	20	29	27	17	38	29	29	20	38	40	40	26	29	19	37	19	22	48	21	40	29	29	37	31	22	22	36	29	19	30	40	31	36	46	0	38	25	31	38	29	32	35
CACTFTPPCA1	32	24	32	31	41	39	12	31	35	32	12	27	28	28	41	46	35	31	17	36	31	35	15	28	43	38	32	28	35	35	42	28	28	41	36	38	35	32	39	37	42	2	24	31	38	46	28	33	40
GT1CONSENSUS	28	21	28	21	24	13	12	17	12	15	12	32	12	12	14	35	33	28	14	14	16	25	12	17	19	21	29	11	12	25	24	19	19	23	14	15	17	29	13	28	18	0	22	23	22	35	12	13	26
GTGANTG10	23	16	23	17	23	27	5	20	16	29	5	17	14	14	25	19	17	22	17	17	20	19	15	17	19	21	23	14	16	19	22	15	15	27	17	28	29	23	27	11	19	1	17	19	20	19	14	15	27
CAATBOX1	23	16	23	38	37	26	12	22	15	30	12	26	42	42	24	23	40	23	22	16	22	24	20	24	25	26	23	42	15	24	39	31	31	30	16	27	31	23	26	32	25	0	31	17	44	23	42	16	30
MYCCONSENSUSAT	20	8	20	32	26	22	10	28	14	18	10	14	24	24	18	20	18	20	4	16	28	16	4	20	18	14	22	24	14	16	24	10	10	20	16	22	24	22	22	8	18	0	26	12	38	20	24	16	20
EBOXBNNAPA	20	8	20	32	26	22	10	28	14	18	10	14	24	24	18	20	18	20	4	16	28	16	4	20	18	14	22	24	14	16	24	10	10	20	16	22	24	22	22	8	18	0	26	12	38	20	24	16	20
ARR1AT	20	20	20	29	21	18	6	20	22	27	6	26	38	38	32	36	25	19	9	24	20	35	8	29	14	14	21	38	22	35	21	16	16	25	24	35	32	21	18	17	14	0	34	20	24	36	38	24	26
ACGTATERD1	18	16	18	10	6	18	4	24	14	18	4	12	8	8	14	14	8	18	14	14	24	8	14	6	20	14	18	8	14	8	8	18	18	8	14	16	18	18	18	6	20	0	6	12	20	14	8	14	8
WRKY71OS	16	21	16	20	20	30	6	22	7	23	6	22	13	13	11	18	17	15	5	8	21	10	4	9	21	21	16	13	7	10	20	10	10	17	8	12	26	16	30	23	20	1	19	18	25	18	13	9	17
GATABOX	13	24	13	21	24	18	12	16	17	12	12	12	16	16	21	17	26	13	14	17	15	16	12	20	15	9	13	16	17	16	24	17	17	23	17	22	12	13	18	12	14	0	19	22	17	17	16	16	24
GT1GMSCAM4	12	5	12	6	7	3	4	6	5	9	4	8	3	3	1	6	12	12	1	6	6	2	0	4	6	4	12	2	5	2	7	3	3	5	6	1	10	12	3	6	6	0	9	4	9	6	3	6	6
TATABOX5	12	6	12	11	8	3	2	1	3	1	2	16	16	16	3	6	2	13	4	3	1	8	4	9	10	12	12	16	3	8	8	7	7	11	3	3	1	12	3	12	10	0	20	6	8	6	16	3	11
SEF4MOTIFGM7S	11	3	11	9	10	1	2	4	6	6	2	11	6	6	4	9	2	11	1	7	4	5	1	9	1	4	11	6	6	5	9	2	2	10	7	4	7	11	1	8	1	0	10	4	3	9	6	6	10
POLLEN1LELAT52	10	15	10	14	12	9	7	12	11	9	7	10	16	16	6	12	14	10	18	11	11	15	14	13	8	10	9	16	11	15	12	12	12	12	11	6	11	9	9	26	9	0	12	14	12	12	16	12	12
RHERPATEXPA7	10	1	10	5	3	6	0	5	2	5	0	2	3	3	0	0	2	10	2	2	5	1	2	3	3	2	10	3	2	1	3	1	1	6	2	1	5	10	6	2	3	0	1	0	4	0	3	2	6
ABRELATERD1	9	6	9	6	3	7	0	11	3	9	0	4	3	3	0	5	1	9	3	3	11	0	3	2	4	2	9	3	3	0	3	2	2	4	3	2	9	9	7	3	4	0	0	5	6	5	3	3	4
MYBCORE	9	9	9	4	5	7	2	4	7	3	2	9	5	5	8	13	5	9	1	7	4	12	1	4	2	25	8	5	7	12	5	7	7	6	7	8	4	8	7	8	2	1	4	7	7	12	5	7	6
RAV1AAT	9	7	9	8	3	13	2	11	9	13	2	10	9	9	8	3	13	9	5	9	11	13	5	8	17	4	9	9	9	13	3	6	6	9	9	7	13	9	13	13	16	0	6	7	3	3	9	8	9
IBOXCORE	8	5	8	5	10	6	5	6	4	3	5	7	2	2	6	7	6	8	1	4	5	6	1	7	5	3	8	2	4	6	10	3	3	9	4	7	3	8	6	3	4	0	6	6	6	7	2	3	9
TAAAGSTKST1	8	3	8	5	4	5	1	1	4	3	1	8	7	7	6	5	10	8	7	4	1	10	6	4	8	7	8	7	4	10	4	6	6	8	4	6	4	8	5	7	8	0	12	8	9	5	7	4	8
INRNTPSADB	7	5	7	10	6	4	5	3	3	3	5	4	7	7	7	4	3	7	3	3	3	2	3	7	6	3	7	7	3	2	6	4	4	6	3	7	2	7	4	10	7	0	5	6	3	4	7	2	6
POLASIG1	7	4	7	15	10	2	1	1	3	6	1	10	11	11	1	4	5	7	2	2	1	14	2	7	7	12	7	11	3	14	11	3	3	8	2	1	6	7	2	11	7	0	22	7	11	4	11	2	7
WBOXNTERF3	7	14	7	7	12	18	4	8	3	13	4	10	8	8	5	10	6	7	1	3	8	4	0	4	10	8	6	8	3	4	12	4	4	9	3	6	14	6	18	11	10	0	13	12	15	10	8	4	9
ROOTMOTIFTAPOX1	7	18	7	19	22	7	6	7	10	16	6	15	17	17	5	19	18	7	13	10	7	13	12	27	8	11	7	17	10	13	21	20	20	25	10	5	17	7	7	12	9	0	14	15	22	20	17	8	23
MYB1AT	6	6	5	1	6	3	0	3	5	3	0	8	5	5	7	9	4	7	0	5	3	8	0	4	6	5	5	5	5	8	6	2	2	5	5	7	5	5	3	5	6	0	4	4	7	9	5	4	5
CURECORECR	6	6	6	4	4	20	6	22	2	16	6	6	18	18	20	12	12	6	2	2	22	8	0	18	14	2	6	18	2	8	4	6	6	14	2	20	16	6	20	6	14	0	12	10	10	12	18	2	14
MARTBOX	6	0	6	9	7	0	2	0	2	5	2	14	20	20	17	1	0	6	1	2	0	3	1	4	4	1	6	20	2	3	7	1	1	19	2	0	4	6	0	3	4	0	3	0	4	1	20	6	19
POLASIG3	6	6	6	7	5	6	4	2	2	1	4	12	8	8	3	6	1	6	6	2	2	6	6	12	9	11	6	8	2	6	5	12	12	8	2	3	1	6	6	8	9	0	5	4	10	6	8	2	8
MYB2CONSENSUSAT	6	7	6	0	1	2	2	3	4	1	2	6	4	4	6	9	3	6	0	4	3	5	0	1	1	13	5	4	4	5	1	2	2	3	4	6	1	5	2	1	1	0	1	5	2	9	4	4	3
CACGTGMOTIF	6	0	6	4	2	6	0	8	0	6	0	2	2	2	0	2	0	6	0	0	8	0	0	0	0	0	6	2	0	0	2	0	0	4	0	2	6	6	6	0	0	0	0	0	2	2	2	0	4
NODCON2GM	6	5	6	4	7	9	2	9	9	9	1	6	7	7	8	6	8	6	6	9	9	9	5	4	8	2	7	7	9	9	6	1	1	9	9	7	10	7	9	11	9	0	6	5	4	6	7	10	10
OSE2ROOTNODULE	6	5	6	4	7	9	2	9	9	9	1	6	7	7	8	6	8	6	6	9	9	9	5	4	8	2	7	7	9	9	6	1	1	9	9	7	10	7	9	11	9	0	6	5	4	6	7	10	10
BIHD1OS	5	4	5	10	6	8	2	13	2	8	2	11	4	4	2	4	11	5	2	3	13	3	2	4	10	10	6	4	2	3	6	2	2	5	3	2	9	6	8	10	9	0	4	4	7	4	4	3	5
EECCRCAH1	5	5	5	3	3	8	0	7	6	1	0	3	4	4	5	7	9	4	8	6	7	8	7	3	1	3	6	4	6	8	3	7	7	3	6	5	3	6	8	2	1	0	4	5	6	7	4	6	3
MYBCOREATCYCB1	5	10	5	2	0	2	1	2	2	1	1	6	1	1	3	7	0	5	0	2	2	1	0	0	2	17	4	1	2	1	0	0	0	2	2	3	1	4	2	1	2	0	3	7	1	7	1	2	2
WBOXHVISO1	5	8	5	5	6	8	4	2	2	4	4	8	3	3	3	8	5	5	0	2	2	2	0	2	5	2	5	3	2	2	6	2	2	8	2	4	6	5	8	5	5	0	7	7	8	8	3	3	8
ABRERATCAL	4	2	4	4	1	6	1	7	0	7	1	4	2	2	0	2	1	4	0	0	7	0	0	0	2	1	4	2	0	0	1	0	0	3	0	1	7	4	6	2	2	0	0	2	9	2	2	0	3
POLASIG2	4	2	4	2	4	0	1	2	1	2	1	1	1	1	0	2	1	4	0	1	2	6	0	4	3	3	4	1	1	6	4	1	1	1	1	1	2	4	0	3	2	0	13	2	3	2	1	1	1
ASF1MOTIFCAMV	4	3	4	3	2	4	0	1	2	2	0	1	1	1	4	4	0	3	2	2	0	3	2	1	1	3	4	1	2	3	2	4	4	3	2	4	3	4	4	2	1	1	2	2	3	4	1	2	3
CGACGOSAMY3	4	2	4	1	1	2	1	2	4	2	1	0	3	3	3	1	1	4	0	4	2	3	0	0	1	0	4	3	4	3	1	0	0	1	4	3	3	4	2	3	1	0	1	2	0	1	3	4	1
300Element	4	2	5	4	2	0	1	0	0	3	1	1	2	2	1	2	4	4	1	0	0	3	1	0	1	6	5	2	0	3	2	1	1	2	0	1	4	5	0	4	1	0	7	2	0	2	2	1	3
TATABOXOSPAL	4	0	4	0	0	0	1	0	0	2	1	1	2	2	0	2	2	4	0	0	0	0	0	5	0	3	4	2	0	0	0	2	2	1	0	0	2	4	0	2	0	0	5	0	2	2	2	0	1
CBFHV	4	2	4	2	0	5	0	2	5	4	0	1	2	2	3	0	3	4	0	5	2	6	0	0	2	0	4	2	5	6	0	1	1	1	5	3	5	4	5	3	2	0	2	2	1	0	2	5	1
10PEHVPSBD	4	4	4	3	5	1	1	0	2	0	1	3	3	3	1	4	0	4	0	2	0	2	0	4	1	1	4	3	2	2	5	3	3	4	2	0	1	4	1	4	1	0	4	3	2	4	3	2	3
WBOXATNPR1	3	8	3	7	5	13	3	9	1	9	3	2	6	6	3	7	7	3	1	2	8	2	1	3	9	7	3	6	1	2	5	2	2	5	2	3	11	3	13	6	8	0	8	7	11	7	6	3	5
CCAATBOX1	3	1	3	7	3	7	0	7	2	7	0	8	6	6	7	8	9	3	1	2	7	4	1	4	3	9	3	6	2	4	5	6	6	5	2	7	9	3	7	9	3	0	3	1	8	8	6	2	5
PRECONSCRHSP70A	3	8	3	2	1	4	2	4	1	4	2	0	1	1	4	0	1	3	0	1	4	3	0	0	2	4	3	1	1	3	1	2	2	2	1	4	4	3	4	3	2	0	1	8	1	0	1	1	2
ANAERO2CONSENSUS	3	1	3	1	1	1	3	0	3	0	0	0	1	1	3	1	0	3	0	3	0	0	0	0	0	1	3	1	3	0	1	2	2	0	3	2	0	3	1	1	0	0	0	0	1	1	1	7	0
SURECOREATSULTR11	3	2	3	0	2	4	2	6	4	3	2	3	0	0	3	4	4	3	7	4	5	5	7	1	2	4	3	0	4	5	2	4	4	2	4	3	5	3	4	1	2	0	0	2	2	4	0	4	2
ANAERO1CONSENSUS	3	3	3	5	4	0	2	0	2	3	2	3	2	2	2	2	3	3	1	2	0	4	1	1	1	2	2	2	2	4	4	1	1	5	2	1	2	2	0	5	1	0	5	3	2	2	2	1	4
CPBCSPOR	3	3	3	2	5	2	1	1	1	0	1	2	4	4	0	3	0	3	2	1	1	1	2	3	2	2	3	4	1	1	5	0	0	2	1	0	0	3	2	3	2	0	2	3	1	3	4	1	1
HEXMOTIFTAH3H4	2	1	2	1	0	1	0	0	0	1	0	0	0	0	1	1	0	2	2	0	0	2	2	0	0	1	2	0	0	2	0	4	4	1	0	1	1	2	1	0	0	0	1	1	0	1	0	0	1
SV40COREENHAN	2	1	2	1	1	0	0	0	2	0	0	0	0	0	1	4	1	2	0	2	0	1	0	0	1	0	2	0	2	1	1	0	0	2	2	1	0	2	0	0	1	0	3	1	0	4	0	1	2
MYCATERD1	2	1	2	3	2	1	0	3	0	1	0	0	2	2	5	0	2	2	0	0	3	1	0	4	4	1	2	2	0	1	1	1	1	2	0	6	1	2	1	1	4	0	1	1	1	0	2	0	2
BOXIINTPATPB	2	1	2	2	6	2	1	4	3	1	1	1	5	5	0	1	1	2	3	3	4	2	3	3	1	1	2	5	3	2	6	4	4	0	3	1	1	2	2	7	1	0	3	1	1	1	5	3	0
T/GBOXATPIN2	2	2	2	0	1	1	0	0	0	1	0	2	1	1	0	0	1	2	1	0	0	0	1	1	3	1	2	1	0	0	1	0	0	0	0	0	1	2	1	1	3	0	0	2	3	0	1	0	0
TGACGTVMAMY	2	1	2	1	0	1	0	0	0	1	0	0	0	0	1	1	0	2	2	0	0	2	2	0	0	1	2	0	0	2	0	4	4	1	0	1	1	2	1	0	0	0	1	1	0	1	0	0	1
MYCATRD22	2	1	2	3	2	1	0	3	0	1	0	0	2	2	5	0	2	2	0	0	3	1	0	4	4	1	2	2	0	1	1	1	1	2	0	6	1	2	1	1	4	0	1	1	1	0	2	0	2
SREATMSD	2	1	2	1	1	0	1	2	1	0	1	0	1	1	3	0	2	2	0	1	2	1	0	1	3	1	2	1	1	1	1	1	1	3	1	4	0	2	0	0	2	0	1	1	2	0	1	1	3
MYBST1	2	6	2	3	1	1	4	4	3	2	4	0	5	5	7	2	5	2	1	3	4	1	1	5	4	1	2	5	3	1	1	3	3	4	3	8	2	2	1	1	3	0	1	5	6	2	5	3	4
CARGCW8GAT	2	0	2	8	6	2	4	6	2	3	4	6	4	4	3	6	8	2	3	2	6	6	3	2	8	6	2	4	2	6	4	4	4	0	2	3	2	2	2	4	8	0	8	0	10	6	4	2	0
CCA1ATLHCB1	2	0	2	0	0	0	0	0	0	2	0	1	3	3	0	0	3	2	1	0	0	0	0	0	1	0	2	3	0	0	0	1	1	0	0	0	4	2	0	2	1	0	3	0	2	0	3	0	0
HEXAMERATH4	2	0	2	0	1	0	1	1	0	1	1	0	1	1	2	0	0	2	0	0	1	1	0	0	0	0	2	1	0	1	1	0	0	0	0	2	1	2	0	0	0	0	0	0	0	0	1	0	0
XYLAT	2	1	2	0	1	0	1	0	0	0	1	0	1	1	0	0	0	2	0	0	0	0	0	0	0	0	2	1	0	0	1	0	0	0	0	0	0	2	0	1	0	0	0	1	0	0	1	1	0
NTBBF1ARROLB	2	1	2	2	1	3	1	1	1	1	1	3	0	0	3	3	4	2	0	1	1	2	0	1	2	2	2	0	1	2	1	1	1	4	1	3	2	2	3	3	2	0	3	4	8	3	0	1	4
CRTDREHVCBF2	2	2	2	0	0	2	0	0	2	2	0	0	2	2	0	0	2	2	0	2	0	0	0	0	2	0	2	2	2	0	0	0	0	0	2	0	2	2	2	2	2	0	0	2	0	0	2	2	0
PYRIMIDINEBOXOSRAMY1A	2	2	3	3	3	2	3	0	3	3	3	1	3	3	0	3	2	2	5	3	0	4	5	2	3	2	3	3	3	4	3	4	4	1	3	0	3	3	2	3	3	0	0	1	2	3	3	4	1
CGCGBOXAT	2	2	2	6	0	0	2	0	1	4	2	0	0	0	4	0	2	2	0	1	0	0	0	0	2	0	2	0	1	0	0	0	0	2	1	4	4	2	0	4	2	0	0	2	8	0	0	1	2
ACGTCBOX	2	0	2	0	0	0	0	0	0	0	0	0	0	0	0	2	0	2	0	0	0	4	0	0	0	0	2	0	0	4	0	0	0	0	0	0	0	2	0	0	0	0	0	0	0	2	0	0	0
CIACADIANLELHC	2	2	2	6	0	1	0	0	2	2	0	2	4	4	0	2	4	2	1	2	0	2	1	0	2	0	2	4	2	2	0	2	2	2	2	0	2	2	1	0	2	0	1	2	1	2	4	2	2
TGTCACACMCUCUMISIN	2	0	2	1	1	0	0	2	0	0	0	0	1	1	0	0	0	2	0	0	2	0	0	0	1	1	2	1	0	0	1	0	0	1	0	0	0	2	0	1	1	0	1	0	1	0	1	0	1
ACGTTBOX	2	0	2	2	0	2	0	0	0	2	0	0	0	0	4	4	0	2	0	0	0	2	0	0	2	0	2	0	0	2	0	2	2	0	0	4	2	2	2	0	2	0	4	0	4	4	0	0	0
GCN4OSGLUB1	1	0	1	0	0	0	0	0	0	0	0	0	0	0	0	0	0	1	0	0	0	0	0	0	0	0	1	0	0	0	0	0	0	0	0	0	0	1	0	1	0	0	0	0	2	0	0	0	0
NODCON1GM	1	1	1	7	2	2	0	3	1	3	0	1	2	2	3	1	4	1	2	1	2	2	2	2	2	2	1	2	1	2	2	5	5	2	1	3	3	1	2	2	2	0	3	2	3	1	2	1	2
RYREPEATLEGUMINBOX	1	0	1	1	2	1	0	3	2	1	0	2	1	1	1	1	1	1	0	2	3	2	0	0	2	0	1	1	2	2	2	0	0	1	2	2	1	1	1	0	2	0	2	0	2	1	1	2	1
WBOXNTCHN48	1	1	1	1	2	3	1	1	1	0	1	2	1	1	0	0	1	1	0	1	1	1	0	0	1	1	1	1	1	1	2	0	0	0	1	0	1	1	3	2	1	0	0	1	0	0	1	1	0
SEF1MOTIF	1	1	1	0	0	0	0	1	0	1	0	0	0	0	0	0	1	1	1	0	1	0	1	0	1	1	1	0	0	0	0	1	1	2	0	0	1	1	0	0	1	0	2	0	2	0	0	0	2
BP5OSWX	1	1	1	0	0	0	0	0	0	0	0	0	0	0	0	0	0	1	0	0	0	0	0	1	0	0	1	0	0	0	0	0	0	0	0	0	0	1	0	0	0	0	0	1	0	0	0	0	0
MYB1LEPR	1	0	1	1	1	0	0	0	0	1	0	1	0	0	1	1	0	1	0	0	0	0	0	0	0	3	1	0	0	0	1	0	0	1	0	1	2	1	0	0	0	0	0	0	1	1	0	0	1
CELLCYCLESC	1	1	1	0	0	0	0	0	0	0	0	0	0	0	0	0	0	1	0	0	0	0	0	0	0	0	1	0	0	0	0	0	0	0	0	0	0	1	0	0	0	0	0	0	0	0	0	0	0
OSE1ROOTNODULE	1	1	1	7	2	2	0	3	1	3	0	1	2	2	3	1	4	1	2	1	2	2	2	2	2	2	1	2	1	2	2	5	5	2	1	3	3	1	2	2	2	0	3	2	3	1	2	1	2
INTRONLOWER	1	1	1	0	0	1	0	0	0	0	0	0	0	0	0	0	1	1	0	0	0	0	0	0	1	0	1	0	0	0	0	0	0	0	0	0	0	1	1	1	1	0	1	1	2	0	0	0	0
SORLIP2AT	1	0	1	1	0	2	0	1	2	2	0	1	3	3	1	0	1	1	0	2	1	3	0	4	0	0	1	3	2	3	0	4	4	5	2	1	4	1	2	3	0	0	3	0	4	0	3	2	5
Factor	1	1	1	1	1	1	1	1	1	1	1	1	1	1	1	1	1	1	1	1	1	1	1	1	1	1	1	1	1	1	1	1	1	1	1	1	1	1	1	1	1	1	1	1	1	1	1	1	1
CEREGLUBOX3PSLEGA	1	0	1	0	0	0	0	0	0	0	0	0	0	0	0	0	0	1	0	0	0	0	0	0	0	0	1	0	0	0	0	0	0	0	0	0	0	1	0	0	0	0	0	0	0	0	0	0	0
SP8BFIBSP8BIB	1	0	1	0	1	1	0	0	1	0	0	1	1	1	0	2	0	1	2	1	0	2	2	0	1	0	1	1	1	2	1	2	2	2	1	0	0	1	1	1	1	0	0	2	0	2	1	1	2
TBOXATGAPB	1	0	1	1	3	2	2	1	1	2	2	5	2	2	2	4	6	1	1	1	1	3	1	3	7	1	1	2	1	3	3	0	0	4	1	2	2	1	2	2	7	0	1	0	2	4	2	1	4
RYREPEATBNNAPA	1	0	1	1	4	1	1	4	6	3	1	2	3	3	2	1	1	1	0	6	4	2	0	2	3	0	1	3	6	2	4	1	1	2	6	3	3	1	1	1	3	0	2	0	2	1	3	6	2
SORLIP5AT	1	0	1	0	0	2	0	0	1	0	0	0	0	0	0	1	0	1	0	1	0	0	0	0	0	0	1	0	1	0	0	0	0	0	1	0	0	1	2	1	0	0	1	0	0	1	0	1	0
ERELEE4	1	1	1	2	0	0	0	0	1	0	0	1	2	2	0	0	1	1	0	1	0	0	0	1	1	1	1	2	1	0	0	1	1	1	1	0	0	1	0	1	1	0	0	2	1	0	2	1	1
-300CORE	1	0	1	1	0	0	0	0	0	0	0	0	0	0	1	1	0	1	2	0	0	2	2	0	0	2	1	0	0	2	0	0	0	0	0	1	0	1	0	0	0	0	0	0	0	1	0	0	0
RYREPEATGMGY2	1	0	1	1	2	1	0	2	2	1	0	2	1	1	1	0	1	1	0	2	2	0	0	0	1	0	1	1	2	0	2	0	0	0	2	2	1	1	1	0	1	0	0	0	0	0	1	2	0
DRECRTCOREAT	1	0	1	2	0	2	0	1	2	1	0	1	0	0	1	0	0	1	0	2	1	5	0	0	0	0	1	0	2	5	0	1	1	0	2	1	1	1	2	0	0	0	0	0	1	0	0	2	0
MYBPLANT	1	2	2	1	2	1	0	1	1	1	0	1	2	2	0	5	0	1	0	1	1	5	0	0	2	2	2	2	1	5	2	0	0	0	1	0	1	2	1	1	2	0	0	0	2	5	2	1	0
MYBATRD22	1	0	1	0	2	0	0	1	2	0	0	0	0	0	1	0	0	1	0	2	1	0	0	0	0	0	1	0	2	0	2	0	0	1	2	1	0	1	0	0	0	0	1	0	1	0	0	1	1
L1BOXATPDF1	1	0	1	2	0	0	0	0	0	0	0	0	1	1	0	0	1	1	1	0	0	1	1	0	0	0	1	1	0	1	0	1	1	0	0	0	0	1	0	1	0	0	2	0	2	0	1	0	0
PREATPRODH	1	1	1	3	5	2	0	3	0	0	0	0	2	2	2	2	0	1	0	0	3	1	0	0	0	3	1	2	0	1	5	1	1	1	0	3	0	1	2	1	0	1	3	1	5	2	2	0	1
PYRIMIDINEBOXHVEPB1	1	0	1	0	0	0	0	1	0	0	0	0	0	0	0	2	1	1	0	1	1	0	0	1	0	0	1	0	0	0	0	1	1	0	1	0	0	1	0	1	0	0	2	0	0	2	0	1	0
SORLIP1AT	1	1	1	2	2	4	0	3	1	2	0	2	1	1	2	4	1	1	2	2	3	1	2	2	1	0	1	1	1	1	2	3	3	6	2	2	2	1	4	2	1	0	3	0	0	4	1	2	6
RBCSCONSENSUS	1	0	1	3	0	1	0	0	0	0	0	2	0	0	1	1	1	1	0	0	0	0	0	0	1	1	1	0	0	0	0	0	0	1	0	1	0	1	1	0	1	0	1	0	0	1	0	0	1
IBOXCORENT	1	3	1	0	0	0	1	0	0	0	1	0	0	0	0	0	0	1	0	0	0	2	0	1	1	0	1	0	0	2	0	0	0	0	0	0	0	1	0	0	1	0	2	3	0	0	0	0	0
REBETALGLHCB21	1	0	1	0	0	0	1	1	0	1	1	0	1	1	1	0	1	1	0	0	1	0	0	0	1	1	1	1	0	0	0	0	0	0	0	1	1	1	0	0	1	0	0	0	1	0	1	0	0
PROXBBNNAPA	1	0	1	0	0	0	0	0	0	0	0	0	0	0	0	0	0	1	0	0	0	0	0	0	0	0	1	0	0	0	0	0	0	0	0	0	0	1	0	1	0	0	0	0	1	0	0	0	0
RAV1BAT	1	0	1	0	0	1	0	0	1	1	0	0	2	2	0	2	1	1	0	1	0	0	0	0	0	0	1	2	1	0	0	0	0	0	1	0	1	1	1	0	0	0	1	0	0	2	2	1	0
LTRECOREATCOR15	1	1	1	3	1	2	1	4	5	2	1	1	0	0	1	2	0	1	0	4	4	7	0	0	1	4	1	0	5	7	1	1	1	0	4	1	2	1	2	0	1	0	0	1	2	2	0	4	0
MYB2AT	1	1	1	0	0	1	1	0	3	0	1	0	0	0	2	2	1	1	0	3	0	1	0	1	0	1	1	0	3	1	0	1	1	1	3	2	0	1	1	0	0	0	0	1	0	2	0	3	1
GT1CORE	1	2	1	1	2	1	0	1	2	1	0	0	4	4	0	2	1	1	1	2	1	1	1	2	1	1	1	4	2	1	2	1	1	0	2	0	1	1	1	3	1	0	0	2	6	2	4	2	0
SEF3MOTIFGM	1	3	1	0	3	2	0	2	5	0	0	3	5	5	2	1	3	1	0	5	2	1	0	2	3	4	1	5	5	1	3	2	2	0	5	2	0	1	2	2	3	0	3	2	4	1	5	5	0
CANBNNAPA	1	0	1	3	1	3	0	1	2	2	0	3	1	1	0	1	1	1	1	2	1	1	1	0	2	1	1	1	2	1	1	2	2	2	2	0	3	1	3	2	2	0	2	0	1	1	1	2	2
IBOX	1	3	1	1	1	1	1	1	1	1	1	1	0	0	3	1	1	1	0	1	1	2	0	1	1	0	1	0	1	2	1	0	0	0	1	3	1	1	1	1	1	0	4	3	0	1	0	1	0
REALPHALGLHCB21	1	1	1	1	3	2	0	4	1	0	0	4	5	5	4	7	1	2	1	1	4	3	1	3	3	3	1	5	1	3	4	2	2	2	1	4	1	1	2	2	3	0	3	0	6	7	5	1	2
CAREOSREP1	1	1	1	1	1	2	0	1	3	1	0	0	2	2	0	1	2	1	0	3	1	2	0	0	2	2	1	2	3	2	1	2	2	0	3	0	1	1	2	0	2	0	0	1	1	1	2	3	0
ABREATCONSENSUS	0	0	0	1	0	1	0	0	0	0	0	0	0	0	0	2	0	0	0	0	0	0	0	0	0	0	0	0	0	0	0	0	0	0	0	0	0	0	1	0	0	0	0	0	0	2	0	0	0
TATAPVTRNALEU	0	0	0	1	1	0	0	1	0	0	0	1	0	0	0	0	0	0	1	0	1	3	1	3	0	1	0	0	0	3	1	1	1	1	0	0	0	0	0	1	0	0	1	0	0	0	0	0	1
AGL2ATCONSENSUS	0	0	0	0	0	0	0	0	0	0	0	0	0	0	0	0	0	0	0	0	0	0	0	0	0	0	0	0	0	0	0	1	1	0	0	0	0	0	0	0	0	0	0	0	0	0	0	0	0
PALBOXLPC	0	0	1	1	0	0	0	1	0	0	0	1	1	1	0	0	0	0	0	0	1	1	0	0	0	0	1	1	0	1	0	0	0	0	0	0	0	1	0	0	0	0	0	0	0	0	1	0	0
SITEIIATCYTC	0	0	0	0	2	1	0	0	4	2	0	5	2	2	0	3	2	0	0	4	0	2	0	1	1	1	0	2	4	2	2	1	1	6	4	0	3	0	1	4	1	0	1	1	4	3	2	4	6
AUXRETGA1GMGH3	0	0	0	0	0	0	0	0	0	0	0	0	0	0	0	0	0	0	0	0	0	0	0	0	0	0	0	0	0	0	0	1	1	0	0	0	0	0	0	0	0	0	0	0	0	0	0	0	0
ELRECOREPCRP1	0	2	0	0	1	4	0	1	0	5	0	0	3	3	1	0	0	0	0	0	1	1	0	0	2	0	0	3	0	1	1	0	0	0	0	1	5	0	4	2	2	0	3	2	0	0	3	0	0
ACGTABOX	0	0	0	0	0	2	0	4	0	0	0	0	0	0	0	0	0	0	0	0	4	0	0	0	6	0	0	0	0	0	0	0	0	0	0	0	0	0	2	0	6	0	0	0	2	0	0	0	0
AACACOREOSGLUB1	0	0	0	2	2	1	2	0	0	0	2	1	1	1	2	1	1	0	1	0	0	0	1	0	2	2	0	1	0	0	2	0	0	1	0	1	0	0	1	0	2	0	1	0	1	1	1	0	1
GLMHVCHORD	0	0	0	0	0	0	0	0	0	0	0	0	0	0	0	0	0	0	0	0	0	0	0	0	0	0	0	0	0	0	0	0	0	0	0	0	0	0	0	1	0	0	0	0	3	0	0	0	0
GARE2OSREP1	0	0	0	0	0	0	0	0	0	0	0	0	0	0	0	0	0	0	0	0	0	0	0	1	0	1	0	0	0	0	0	0	0	0	0	0	0	0	0	0	0	0	0	0	0	0	0	0	0
UP2ATMSD	0	0	0	0	0	0	1	0	1	0	1	1	0	0	0	0	0	0	1	1	0	0	1	0	0	0	0	0	1	0	0	2	2	0	1	0	0	0	0	0	0	0	1	0	0	0	0	1	0
CARGNCAT	0	0	0	0	0	0	0	2	0	0	0	2	0	0	0	4	0	0	0	0	2	0	0	2	0	0	0	0	0	0	0	0	0	0	0	0	0	0	0	0	0	0	0	0	0	4	0	0	0
CATATGGMSAUR	0	0	0	2	2	0	0	2	2	0	0	0	2	2	2	0	0	0	2	2	2	0	2	0	2	0	0	2	2	0	2	0	0	0	2	2	2	0	0	0	2	0	8	2	2	0	2	2	0
GAGAGMGSA1	0	0	0	0	0	0	0	0	0	0	0	3	0	0	0	0	0	0	0	0	0	0	0	0	4	0	0	0	0	0	0	0	0	0	0	0	0	0	0	1	4	0	0	0	0	0	0	0	0
EMBP1TAEM	0	0	0	1	0	1	0	0	0	0	0	0	0	0	0	1	0	0	0	0	0	0	0	0	0	0	0	0	0	0	0	0	0	0	0	0	0	0	1	0	0	0	0	0	0	1	0	0	0
GT1MOTIFPSRBCS	0	0	0	0	0	0	0	0	0	0	0	0	0	0	1	0	0	0	0	0	0	0	0	0	0	1	0	0	0	0	0	0	0	0	0	1	0	0	0	0	0	0	0	0	0	0	0	0	0
QARBNEXTA	0	0	0	0	1	0	0	0	0	0	0	0	0	0	0	0	0	0	0	0	0	0	0	0	1	1	0	0	0	0	1	0	0	0	0	0	0	0	0	1	1	0	0	0	2	0	0	0	0
SURE1STPAT21	0	0	0	0	1	0	0	0	0	0	0	0	0	0	0	0	0	0	0	0	0	0	0	0	0	0	0	0	0	0	1	0	0	0	0	0	0	0	0	0	0	0	0	0	1	0	0	0	0
ANAERO4CONSENSUS	0	0	0	1	0	0	0	0	0	0	0	0	0	0	0	0	0	0	0	0	0	0	0	0	1	0	0	0	0	0	0	0	0	0	0	0	0	0	0	0	1	0	0	0	0	0	0	0	0
DPBFCOREDCDC3	0	1	0	5	0	8	0	8	2	10	0	4	4	4	1	2	2	0	0	2	8	2	0	2	3	2	0	4	2	2	0	0	0	3	2	2	10	0	8	3	2	0	2	1	2	2	4	2	3
SURE2STPAT21	0	0	0	0	0	0	0	0	0	0	0	0	0	0	0	0	0	0	0	0	0	0	0	0	1	1	0	0	0	0	0	0	0	0	0	0	0	0	0	0	1	0	0	0	0	0	0	0	0
EVENINGAT	0	0	0	0	0	0	0	0	0	0	0	0	1	1	0	0	0	0	0	0	0	0	0	1	0	0	0	1	0	0	0	0	0	0	0	0	0	0	0	0	0	0	0	0	1	0	1	0	0
AMMORESIIUDCRNIA1	0	1	0	0	0	0	0	1	0	0	0	0	0	0	0	0	0	0	0	0	1	0	0	0	0	0	0	0	0	0	0	0	0	0	0	0	0	0	0	1	0	0	0	1	0	0	0	0	0
CMSRE1IBSPOA	0	0	0	0	0	0	0	0	0	0	0	0	0	0	2	0	1	0	0	0	0	0	0	0	1	0	0	0	0	0	0	0	0	0	0	2	0	0	0	1	1	0	1	0	0	0	0	0	0
NAPINMOTIFBN	0	0	0	1	0	1	0	0	1	1	0	1	0	0	0	0	0	0	0	1	0	1	0	0	0	1	0	0	1	1	0	0	0	0	1	0	2	0	1	1	0	0	1	1	1	0	0	1	0
SORLREP5AT	0	0	0	0	0	0	0	0	0	0	0	0	0	0	0	0	0	0	0	0	0	0	0	0	0	0	0	0	0	0	0	0	0	1	0	0	0	0	0	0	0	0	0	0	0	0	0	0	1
SITEIIBOSPCNA	0	0	0	0	0	0	0	0	0	0	0	0	0	0	0	0	0	0	0	0	0	0	0	0	0	0	0	0	0	0	0	0	0	0	0	0	0	0	0	0	0	0	0	0	2	0	0	0	0
LEAFYATAG	0	0	0	0	0	0	0	0	0	0	0	1	0	0	0	0	1	0	0	0	0	1	0	0	0	0	0	0	0	1	0	0	0	0	0	0	0	0	0	0	0	0	0	0	0	0	0	0	0
SORLREP4AT	0	0	0	0	0	0	0	0	0	0	0	0	0	0	0	0	0	0	0	0	0	0	0	0	0	0	0	0	0	0	0	1	1	0	0	0	0	0	0	0	0	0	0	0	0	0	0	0	0
RGATAOS	0	0	0	0	0	0	0	0	0	0	0	0	0	0	0	0	0	0	0	0	0	0	0	0	0	0	0	0	0	0	0	0	0	0	0	0	0	0	0	0	0	0	0	0	1	0	0	0	0
WBBOXPCWRKY1	0	2	0	2	1	1	0	0	0	3	0	0	2	2	1	2	0	0	0	0	0	0	0	2	1	0	0	2	0	0	1	0	0	1	0	1	5	0	1	0	1	0	4	1	4	2	2	0	1
GAREAT	0	1	0	3	5	2	2	0	1	1	2	1	0	0	0	1	1	0	1	1	0	0	1	2	3	1	0	0	1	0	5	1	1	4	1	0	1	0	2	1	3	0	1	0	1	1	0	1	4
MARARS	0	0	0	0	0	0	0	0	0	2	0	0	0	0	0	0	0	0	0	0	0	0	0	0	0	0	0	0	0	0	0	1	1	0	0	0	2	0	0	0	0	0	0	0	0	0	0	0	0
GARE1OSREP1	0	0	0	1	0	0	0	0	0	0	0	0	0	0	0	2	0	0	0	0	0	2	0	0	0	0	0	0	0	2	0	0	0	0	0	0	0	0	0	1	0	0	0	0	1	2	0	0	0
DRE1COREZMRAB17	0	0	0	0	0	0	0	0	0	0	0	0	0	0	1	0	0	0	0	0	0	0	0	0	1	0	0	0	0	0	0	1	1	0	0	1	0	0	0	0	1	0	0	0	0	0	0	0	0
CEREGLUBOX1PSLEGA	0	0	0	0	0	1	0	0	0	0	0	0	0	0	0	0	0	0	0	0	0	0	0	0	0	0	0	0	0	0	0	0	0	0	0	0	0	0	1	0	0	0	0	0	0	0	0	0	0
PALBOXAPC	0	0	0	0	1	0	0	1	0	1	0	0	0	0	2	0	1	0	0	0	1	0	0	0	1	1	0	0	0	0	0	0	0	0	0	2	1	0	0	1	1	0	1	0	0	0	0	0	0
TATCCAYMOTIFOSRAMY3D	0	3	0	0	0	0	2	0	0	1	2	0	1	1	0	0	1	0	0	0	0	0	0	2	1	0	0	1	0	0	0	0	0	2	0	1	1	0	0	0	1	0	1	3	2	0	1	0	2
WUSATAg	0	0	0	1	1	0	0	0	0	1	0	1	1	1	0	0	0	0	0	0	0	0	0	0	0	0	0	1	0	0	1	0	0	0	0	0	1	0	0	0	0	0	0	0	0	0	1	0	0
CARGATCONSENSUS	0	0	0	0	0	0	0	0	0	0	0	0	0	0	2	2	0	0	0	0	0	0	0	0	0	0	0	0	0	0	0	0	0	2	0	2	0	0	0	0	0	0	0	0	0	2	0	0	2
LREBOXIPCCHS1	0	0	0	0	0	0	0	0	0	0	0	0	0	0	0	0	0	0	0	0	0	0	0	0	0	0	0	0	0	0	0	0	0	0	0	0	0	0	0	0	0	0	0	0	0	0	0	0	0
PROLAMINBOXOSGLUB1	0	0	0	0	0	0	1	0	0	0	1	0	0	0	1	1	1	0	0	0	0	0	0	0	0	0	0	0	0	0	0	0	0	0	0	1	0	0	0	1	0	0	0	0	0	1	0	0	0
SITEIOSPCNA	0	0	0	0	0	0	0	0	0	0	0	0	0	0	0	1	0	0	0	0	0	0	0	0	0	0	0	0	0	0	0	0	0	0	0	0	0	0	0	0	0	0	0	0	0	1	0	0	0
GMHDLGMVSPB	0	0	0	0	0	0	0	0	0	0	0	0	0	0	0	0	0	0	0	0	0	0	0	0	0	0	0	0	0	0	0	0	0	0	0	0	0	0	0	1	0	0	0	0	0	0	0	0	0
AT1BOX	0	0	0	0	0	0	1	0	0	0	1	0	0	0	0	0	0	0	0	0	0	0	0	0	0	0	0	0	0	0	0	0	0	0	0	0	0	0	0	0	0	0	0	0	0	0	0	0	0
ANAERO3CONSENSUS	0	0	0	1	0	1	0	1	1	1	0	0	0	0	1	1	1	0	0	1	1	0	0	0	0	0	0	0	1	0	0	0	0	0	1	1	1	0	1	0	0	0	1	0	1	1	0	1	0
OPAQUE2ZMB32	0	0	0	0	0	0	0	0	0	0	0	1	0	0	0	0	0	0	0	0	0	0	0	0	0	0	0	0	0	0	0	0	0	0	0	0	0	0	0	0	0	0	0	0	0	0	0	0	0
POLLEN2LELAT52	0	0	0	0	0	0	0	0	0	0	0	0	0	0	0	0	0	0	0	0	0	0	0	0	0	0	0	0	0	0	0	0	0	0	0	0	0	0	0	0	0	0	0	0	1	0	0	0	0
LTRE1HVBLT49	0	0	0	2	1	2	0	0	1	1	0	4	1	1	0	0	0	0	0	1	0	2	0	0	0	0	0	1	1	2	1	1	1	0	1	0	2	0	2	2	0	0	0	0	0	0	1	1	0
ARFAT	0	1	0	0	0	1	1	4	0	1	1	0	0	0	1	2	2	0	5	0	4	1	5	0	1	0	0	0	0	1	0	2	2	1	0	1	2	0	1	0	1	0	0	1	0	2	0	0	1
GRAZMRAB28	0	0	0	0	0	0	0	0	0	0	0	0	0	0	0	0	0	0	0	0	0	0	0	0	0	0	0	0	0	0	0	0	0	0	0	0	0	0	0	0	0	0	0	0	0	0	0	0	0
RYREPEATVFLEB4	0	0	0	0	2	0	0	0	0	0	0	0	0	0	0	0	0	0	0	0	0	0	0	0	0	0	0	0	0	0	2	0	0	0	0	0	0	0	0	0	0	0	0	0	0	0	0	0	0
LRENPCABE	0	0	0	0	0	0	0	0	0	0	0	0	0	0	0	1	0	0	0	0	0	0	0	0	0	0	0	0	0	0	0	0	0	0	0	0	0	0	0	0	0	0	0	0	0	1	0	0	0
P1BS	0	4	0	2	0	0	0	0	0	0	0	0	2	2	4	0	2	0	0	0	0	0	0	8	2	0	0	2	0	0	0	0	0	0	0	2	0	0	0	2	2	0	0	4	2	0	2	0	0
MYBGAHV	0	0	0	1	4	1	2	0	1	1	2	0	0	0	0	1	0	0	0	1	0	0	0	2	3	0	0	0	1	0	4	1	1	4	1	0	1	0	1	1	3	0	0	0	1	1	0	1	4
E2FCONSENSUS	0	0	0	1	0	1	0	2	0	0	0	1	0	0	1	1	0	0	0	0	2	0	0	1	0	2	0	0	0	0	0	1	1	0	0	1	1	0	1	2	0	0	0	0	0	1	0	0	0
ACGTROOT1	0	0	0	0	0	0	0	0	0	0	0	0	0	0	0	0	0	0	0	0	0	0	0	0	0	0	0	0	0	0	0	0	0	0	0	0	0	0	0	0	0	0	0	0	0	0	0	0	0
S1FSORPL21	0	0	0	0	0	0	0	0	0	0	0	0	0	0	0	0	0	0	0	0	0	0	0	0	0	0	0	0	0	0	0	0	0	0	0	0	0	0	0	0	0	0	1	0	0	0	0	0	0
UPRMOTIFIIAT	0	0	0	0	0	0	0	1	0	0	0	0	0	0	0	2	0	0	0	0	1	0	0	0	0	1	0	0	0	0	0	0	0	0	0	0	0	0	0	0	0	0	0	0	0	2	0	0	0
ACGTABREMOTIFAOSOSEM	0	1	0	0	0	0	0	0	1	0	0	0	0	0	0	0	0	0	0	1	0	0	0	0	0	0	0	0	1	0	0	0	0	0	1	0	0	0	0	0	0	0	0	1	0	0	0	1	0
AGMOTIFNTMYB2	0	0	0	1	0	0	0	0	1	0	0	0	0	0	0	0	0	0	0	1	0	0	0	0	0	0	0	0	1	0	0	0	0	0	1	0	0	0	0	0	0	0	0	0	0	0	0	1	0
GCCCORE	0	0	0	0	0	0	0	0	0	0	0	0	0	0	1	0	0	0	0	0	0	0	0	0	0	1	0	0	0	0	0	0	0	0	0	1	0	0	0	1	0	0	0	0	0	0	0	0	0
MYBPZM	0	3	1	5	5	3	0	3	2	2	0	3	3	3	3	6	1	1	0	2	3	5	0	2	4	4	1	3	2	5	5	3	3	3	2	4	1	1	3	1	4	0	0	3	2	6	3	2	3
ABREOSRAB21	0	0	0	0	0	0	0	0	0	0	0	0	0	0	1	0	0	0	0	0	0	0	0	0	1	1	0	0	0	0	0	0	0	0	0	1	0	0	0	0	1	0	0	0	0	0	0	0	0
ABREATRD22	0	0	0	1	0	0	0	1	0	0	0	0	0	0	0	1	0	0	0	0	1	0	0	0	0	0	0	0	0	0	0	0	0	0	0	0	0	0	0	0	0	0	0	0	0	1	0	0	0
TATABOX3	0	1	0	4	2	0	0	0	0	2	0	2	1	1	0	1	1	0	1	0	0	9	1	5	3	1	0	1	0	9	2	2	2	1	0	0	3	0	0	4	1	0	2	1	1	1	1	0	1
TATABOX2	0	4	0	1	1	1	1	2	1	1	1	0	3	3	1	2	2	0	0	1	2	3	0	2	1	4	0	3	1	3	1	2	2	3	1	1	1	0	1	1	1	0	4	0	4	2	3	1	3
QELEMENTZMZM13	0	3	0	0	1	3	0	1	1	3	0	0	1	1	1	0	0	0	0	1	1	0	0	0	3	2	0	1	1	0	1	0	0	0	1	1	3	0	3	0	3	0	1	2	0	0	1	1	0
HDZIP2ATATHB2	0	0	0	1	1	0	0	0	0	0	0	0	0	0	0	0	0	0	0	0	0	1	0	0	1	0	0	0	0	1	1	0	0	0	0	0	0	0	0	2	1	0	1	0	0	0	0	0	0
OCTAMOTIF2	0	0	0	0	0	0	0	0	0	0	0	0	0	0	0	0	0	0	0	0	0	0	0	0	0	0	0	0	0	0	0	0	0	0	0	0	0	0	0	0	0	0	0	0	0	0	0	0	0
LTREATLTI78	0	0	0	0	0	0	0	0	2	1	0	1	0	0	1	0	0	0	0	2	0	4	0	0	0	0	0	0	2	4	0	1	1	0	2	1	1	0	0	0	0	0	0	0	1	0	0	2	0
ABRE2HVA22	0	0	0	0	0	0	0	0	0	0	0	0	0	0	0	0	0	0	0	0	0	0	0	0	0	0	0	0	0	0	0	0	0	0	0	0	0	0	0	0	0	0	0	0	0	0	0	0	0
GBOXLERBCS	0	0	0	1	0	0	0	0	0	0	0	0	0	0	0	1	0	0	0	0	0	0	0	0	0	0	0	0	0	0	0	0	0	0	0	0	0	0	0	0	0	0	0	0	0	1	0	0	0
AGATCONSENSUS	0	0	0	0	0	0	0	0	0	0	0	0	0	0	0	1	0	0	0	0	0	0	0	0	0	0	0	0	0	0	0	0	0	0	0	0	0	0	0	1	0	0	0	0	0	1	0	0	0
ACGTABREMOTIFA2OSEM	0	1	0	2	1	5	0	3	1	3	0	1	0	0	0	2	0	0	1	1	3	0	1	0	0	1	0	0	1	0	1	1	1	0	1	0	3	0	5	0	0	0	0	1	0	2	0	1	0
GAGA8HVBKN3	0	0	0	0	0	0	0	0	0	0	0	5	0	0	0	0	0	0	0	0	0	0	0	0	5	0	0	0	0	0	0	0	0	0	0	0	0	0	0	2	5	0	0	0	0	0	0	0	0
WRECSAA01	0	0	0	0	0	0	0	0	0	0	0	0	0	0	0	0	1	0	0	0	0	0	0	1	0	0	0	0	0	0	0	0	0	0	0	0	0	0	0	0	0	0	0	0	0	0	0	0	0
SORLREP3AT	0	0	0	0	0	0	0	0	1	0	0	0	0	0	0	0	1	0	1	1	0	0	1	0	0	0	0	0	1	0	0	2	2	0	1	0	0	0	0	0	0	0	0	0	0	0	0	1	0
AMMORESIVDCRNIA1	0	0	0	1	0	0	0	0	0	0	0	0	0	0	0	0	0	0	0	0	0	0	0	0	0	0	0	0	0	0	0	0	0	0	0	0	0	0	0	0	0	0	0	0	0	0	0	0	0
SP8BFIBSP8AIB	0	0	0	0	0	0	0	0	0	0	0	0	0	0	0	1	0	0	0	0	0	0	0	0	0	0	0	0	0	0	0	0	0	0	0	0	0	0	0	0	0	0	0	0	0	1	0	0	0
ACGTOSGLUB1	0	0	0	1	0	0	0	2	0	0	0	0	0	0	0	2	0	0	0	0	2	0	0	0	0	0	0	0	0	0	0	0	0	0	0	0	0	0	0	0	0	0	0	0	1	2	0	0	0
ABREA2HVA1	0	0	0	0	0	0	0	0	0	0	0	0	0	0	0	1	0	0	0	0	0	0	0	0	0	0	0	0	0	0	0	0	0	0	0	0	0	0	0	0	0	0	0	0	0	1	0	0	0
TATCCAOSAMY	0	4	0	0	0	1	3	0	1	1	3	0	1	1	2	0	4	0	1	1	0	0	1	3	1	0	0	1	1	0	0	2	2	2	1	3	1	0	1	0	1	0	1	4	2	0	1	1	2
BS1EGCCR	0	0	0	0	0	0	0	0	0	0	0	0	2	2	0	0	1	0	0	0	0	0	0	1	0	1	0	2	0	0	0	0	0	0	0	0	0	0	0	0	0	0	0	0	0	0	2	0	0
AGCBOXNPGLB	0	0	0	0	0	0	0	0	0	0	0	0	0	0	0	0	0	0	0	0	0	0	0	0	0	1	0	0	0	0	0	0	0	0	0	0	0	0	0	0	0	0	0	0	0	0	0	0	0
SBOXATRBCS	0	0	0	0	0	1	1	0	0	0	1	0	0	0	1	0	0	0	0	0	0	1	0	0	1	0	0	0	0	1	0	0	0	0	0	1	0	0	1	0	1	0	0	0	0	0	0	0	0
HBOXCONSENSUSPVCHS	0	0	0	0	0	0	0	0	0	0	0	0	0	0	0	0	0	0	0	0	0	0	0	0	0	0	1	0	0	0	0	0	0	0	0	0	0	1	0	0	0	0	0	0	0	0	0	0	0
ABREMOTIFAOSOSEM	0	1	0	0	0	0	0	0	1	0	0	0	0	0	0	0	0	0	0	1	0	0	0	0	0	0	0	0	1	0	0	0	0	0	1	0	0	0	0	0	0	0	0	1	0	0	0	1	0
ARE1	0	0	0	0	0	0	0	0	0	0	0	0	0	0	0	0	0	0	1	0	0	0	1	0	0	0	0	0	0	0	0	0	0	0	0	0	0	0	0	0	0	0	0	0	0	0	0	0	0
ATHB6COREAT	0	0	0	0	0	0	0	0	0	0	0	0	0	0	0	0	0	0	1	0	0	0	1	1	0	1	0	0	0	0	0	0	0	1	0	0	0	0	0	0	0	0	0	0	0	0	0	0	1
NRRBNEXTA	0	0	0	0	0	0	0	0	1	0	0	0	0	0	1	0	0	0	0	1	0	0	0	0	0	0	0	0	1	0	0	0	0	0	1	1	0	0	0	0	0	0	0	0	0	0	0	1	0
VSF1PVGRP18	0	0	0	0	0	0	0	0	0	0	0	0	0	0	0	0	0	0	0	0	0	0	0	0	0	0	0	0	0	0	0	0	0	0	0	0	0	0	0	0	0	0	0	0	0	0	0	0	0
HBOXPVCHS15	0	0	0	0	0	0	0	0	0	0	0	0	0	0	0	0	0	0	0	0	0	0	0	0	0	0	1	0	0	0	0	0	0	0	0	0	0	1	0	0	0	0	0	0	0	0	0	0	0
BOXLCOREDCPAL	0	1	1	3	1	2	0	2	2	2	0	2	5	5	0	6	0	1	0	2	2	5	0	1	5	1	1	5	2	5	1	0	0	0	2	0	2	1	2	1	5	0	0	1	2	6	5	2	0
AMYBOX1	0	0	0	2	4	1	2	0	1	1	2	0	0	0	0	3	1	0	0	1	0	2	0	2	3	0	0	0	1	2	4	1	1	4	1	0	1	0	1	2	3	0	0	0	2	3	0	1	4
AMYBOX2	0	3	0	0	0	0	1	0	0	1	1	0	1	1	0	0	0	0	0	0	0	0	0	2	0	0	0	1	0	0	0	0	0	1	0	1	1	0	0	0	0	0	1	3	2	0	1	0	1
TATABOX4	0	0	0	1	1	0	0	3	0	0	0	5	0	0	0	0	0	0	1	0	3	3	1	6	2	2	0	0	0	3	1	1	1	2	0	0	0	0	0	2	2	0	3	0	0	0	0	0	2
-300MOTIFZMZEIN	0	0	0	0	0	0	0	0	0	0	0	0	0	0	0	0	0	0	0	0	0	0	0	0	0	0	0	0	0	0	0	0	0	0	0	0	0	0	0	1	0	0	0	0	1	0	0	0	0
ANAERO5CONSENSUS	0	0	0	0	0	0	0	0	1	0	0	0	0	0	0	0	0	0	0	1	0	0	0	0	0	0	0	0	1	0	0	0	0	0	1	0	0	0	0	0	0	0	0	0	0	0	0	1	0
ACIPVPAL2	0	0	1	0	0	0	0	0	0	0	0	0	0	0	0	0	0	0	0	0	0	0	0	0	1	0	1	0	0	0	0	0	0	0	0	0	0	1	0	0	1	0	0	0	0	0	0	0	0
LECPLEACS2	0	0	0	2	0	1	0	0	0	3	0	1	1	1	0	0	1	0	1	0	0	2	1	3	0	0	0	1	0	2	0	0	0	3	0	0	3	0	1	0	0	0	1	0	0	0	1	0	3
TELOBOXATEEF1AA1	0	0	0	0	0	0	1	0	0	0	1	0	0	0	0	0	0	0	0	0	0	0	0	0	0	0	0	0	0	0	0	0	0	0	0	0	0	0	0	0	0	0	1	0	0	0	0	0	0
PALBOXPPC	0	0	0	1	0	0	0	0	0	0	0	0	1	1	0	1	0	0	0	0	0	0	0	0	0	1	0	1	0	0	0	0	0	0	0	0	0	0	0	0	0	0	0	0	0	1	1	0	0
EMHVCHORD	0	0	0	0	0	0	0	0	0	0	0	0	0	0	1	1	0	0	0	0	0	1	0	0	0	1	0	0	0	1	0	0	0	0	0	1	0	0	0	0	0	0	0	0	0	1	0	0	0
SEBFCONSSTPR10A	0	0	0	1	1	0	0	3	1	0	0	2	0	0	2	2	4	0	5	1	3	0	5	1	2	1	0	0	1	0	1	2	2	1	1	2	2	0	0	1	2	0	1	0	1	2	0	1	1
D1GMAUX28	0	0	0	0	0	0	0	0	0	0	0	0	0	0	0	0	0	0	0	0	0	0	0	0	0	0	0	0	0	0	0	0	0	0	0	0	0	0	0	0	0	0	0	0	0	0	0	0	0
DRE2COREZMRAB17	0	0	0	1	0	1	0	1	2	1	0	1	0	0	1	0	0	0	0	2	1	5	0	0	0	0	0	0	2	5	0	1	1	0	2	1	1	0	1	0	0	0	0	0	1	0	0	2	0
SORLREP2AT	0	0	0	0	0	0	0	0	0	0	0	0	0	0	0	0	0	0	0	0	0	0	0	0	0	0	0	0	0	0	0	0	0	0	0	0	0	0	0	0	0	0	0	0	1	0	0	0	0
ABREZMRAB28	0	0	0	0	0	0	0	0	0	0	0	0	0	0	0	0	0	0	0	0	0	0	0	0	0	0	0	0	0	0	0	0	0	0	0	0	0	0	0	0	0	0	0	0	0	0	0	0	0
GADOWNAT	0	1	0	1	1	4	0	3	1	3	0	0	0	0	0	0	0	0	0	1	3	0	0	0	0	1	0	0	1	0	1	0	0	0	1	0	3	0	4	0	0	0	0	1	0	0	0	1	0
UP1ATMSD	0	0	0	0	0	0	0	0	0	0	0	0	0	0	0	0	0	0	0	0	0	0	0	0	0	0	0	0	0	0	0	0	0	1	0	0	0	0	0	1	0	0	1	0	0	0	0	0	1
ACGTSEED2	0	0	0	0	0	0	0	0	0	0	0	0	0	0	0	0	0	0	0	0	0	0	0	0	0	0	0	0	0	0	0	0	0	0	0	0	0	0	0	0	0	0	0	0	0	0	0	0	0
MYB26PS	0	0	0	0	0	0	0	0	0	0	0	0	0	0	0	0	0	0	0	0	0	0	0	0	0	0	0	0	0	0	0	0	0	0	0	0	0	0	0	0	0	0	0	0	0	0	0	0	0
TATCCACHVAL21	0	0	0	0	0	0	1	0	0	0	1	0	0	0	0	0	1	0	0	0	0	0	0	0	1	0	0	0	0	0	0	0	0	1	0	0	0	0	0	0	1	0	0	0	0	0	0	0	1
CACGCAATGMGH3	0	0	0	0	0	0	0	0	0	0	0	0	0	0	0	0	0	0	0	0	0	0	0	0	0	0	0	0	0	0	0	0	0	0	0	0	0	0	0	1	0	0	1	0	1	0	0	0	0
BOXIIPCCHS	0	0	0	1	0	1	0	0	0	0	0	1	0	0	0	2	0	0	1	0	0	0	1	0	0	0	0	0	0	0	0	1	1	0	0	0	0	0	1	0	0	0	0	0	0	2	0	0	0
MARABOX1	0	1	0	0	1	0	0	0	0	0	0	0	2	2	0	0	0	0	0	0	0	1	0	1	0	1	0	2	0	1	1	0	0	1	0	0	0	0	0	0	0	0	0	1	0	0	2	0	1
S1FBOXSORPS1L21	0	1	0	0	2	3	1	2	2	3	1	1	2	2	3	0	1	0	0	2	2	2	0	2	2	1	0	2	2	2	2	0	0	0	2	3	3	0	3	2	2	0	3	1	1	0	2	2	0
ZDNAFORMINGATCAB1	0	1	0	0	0	0	0	0	0	0	0	0	0	0	0	0	0	0	0	0	0	0	0	0	0	0	0	0	0	0	0	0	0	0	0	0	0	0	0	0	0	0	0	1	0	0	0	0	0
CTRMCAMV35S	0	0	0	0	0	0	0	0	0	0	0	12	1	1	0	0	0	0	0	0	0	0	0	0	10	0	0	1	0	0	0	0	0	0	0	0	0	0	0	12	13	0	0	0	0	0	1	0	0
IRO2OS	0	0	0	1	0	1	0	0	0	0	0	0	0	0	0	1	0	0	0	0	0	0	0	0	0	0	0	0	0	0	0	0	0	0	0	0	0	0	1	0	0	0	0	0	0	1	0	0	0
CEREGLUBOX2PSLEGA	0	0	0	1	1	1	0	0	0	0	0	2	0	0	1	3	0	0	0	0	0	1	0	1	1	0	0	0	0	1	1	0	0	0	0	1	0	0	1	0	1	0	1	0	0	3	0	0	0
AAGACGTAGATACL12	0	0	0	0	0	0	0	0	0	0	0	0	0	0	0	0	0	0	0	0	0	0	0	0	0	0	0	0	0	0	0	0	0	1	0	0	0	0	0	0	0	0	0	0	0	0	0	0	1
BOXCPSAS1	0	0	0	1	0	2	0	0	0	0	0	1	0	0	0	0	0	0	0	0	0	1	0	0	0	1	0	0	0	1	0	0	0	0	0	0	0	0	2	1	0	1	0	0	0	0	0	0	0
[truncated: 69 more columns]
